# Supplementary material for: Delivering dementia care differently—evaluating the differences and similarities between a specialist medical and mental health unit and standard acute care wards: a qualitative study of family carers’ perceptions of quality of care
Source: PubMed Central journal article supplement — BMJ Open. 2013 Dec 20;3(12):e004198. doi: 10.1136/bmjopen-2013-004198 (PMC3884743; doi:10.1136/bmjopen-2013-004198), 2013-12-20
Supplement: bmjopen-2013-004198.draft_revisions.pdf [file bmjopen-2013-004198.draft_revisions.pdf]

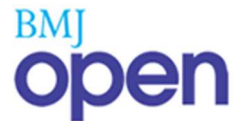

**Delivering Dementia Care Differently. Evaluating the differences and similarities between a specialist medical and mental health unit and standard acute care wards: A qualitative study of family carers' perceptions of quality of care.**

|                                 |                                                                                                                                                                                                                                                                                                                                                                                                                                                         |
|---------------------------------|---------------------------------------------------------------------------------------------------------------------------------------------------------------------------------------------------------------------------------------------------------------------------------------------------------------------------------------------------------------------------------------------------------------------------------------------------------|
| Journal:                        | <i>BMJ Open</i>                                                                                                                                                                                                                                                                                                                                                                                                                                         |
| Manuscript ID:                  | bmjopen-2013-004198                                                                                                                                                                                                                                                                                                                                                                                                                                     |
| Article Type:                   | Research                                                                                                                                                                                                                                                                                                                                                                                                                                                |
| Date Submitted by the Author:   | 08-Oct-2013                                                                                                                                                                                                                                                                                                                                                                                                                                             |
| Complete List of Authors:       | Spencer, Karen; University of Manchester,<br>Foster, Pippa; University of Nottingham, Division of Rehabilitation and Ageing, University of Nottingham<br>Whittamore, Kathy; University of Nottingham, Stroke, division of clinical neuroscience<br>Goldberg, Sarah; University of Nottingham, Division of Rehabilitation and Ageing, University of Nottingham<br>Harwood, Rowan; Health Care of Older People, Nottingham University Hospitals NHS Trust |
| <b>Primary Subject Heading</b>: | Health services research                                                                                                                                                                                                                                                                                                                                                                                                                                |
| Secondary Subject Heading:      | Qualitative research, Health services research, Geriatric medicine                                                                                                                                                                                                                                                                                                                                                                                      |
| Keywords:                       | Dementia < NEUROLOGY, Delirium & cognitive disorders < PSYCHIATRY, QUALITATIVE RESEARCH, Quality in health care < HEALTH SERVICES ADMINISTRATION & MANAGEMENT                                                                                                                                                                                                                                                                                           |
|                                 |                                                                                                                                                                                                                                                                                                                                                                                                                                                         |

SCHOLARONE™  
Manuscripts

1  
2  
3 **Delivering Dementia Care Differently. Evaluating the differences and similarities**  
4 **between a specialist medical and mental health unit and standard acute care wards: A**  
5 **qualitative study of family carers' perceptions of quality of care.**  
6  
7  
8

9  
10 Karen Spencer <sup>1</sup>, Pippa Foster <sup>1</sup>, Kathy H. Whittamore <sup>2</sup>, Sarah E. Goldberg <sup>1</sup>, Rowan H.  
11 Harwood <sup>1-2</sup>.  
12

13  
14  
15 <sup>1</sup> Division of Rehabilitation and Ageing, University of Nottingham. NG7 2UH. UK.  
16

17  
18 <sup>2</sup> Health Care of Older People, Nottingham University Hospitals NHS Trust, Queen's  
19 Medical Centre, Nottingham. NG7 2UH. UK.  
20  
21  
22

23  
24  
25  
26  
27 Correspondence to:  
28

29  
30 Professor Rowan Harwood  
31

32  
33 Health Care of Older People, Nottingham University Hospitals NHS Trust, Queen's Medical  
34 Centre, Nottingham. NG7 2UH.  
35  
36

37  
38 Tel: +44 115 924 9924 ext 61412/62511 Fax: +44 115 970 9947  
39

40  
41 Email: [rowan.harwood@nuh.nhs.uk](mailto:rowan.harwood@nuh.nhs.uk)  
42

43  
44 Word Count: 4,708.  
45  
46  
47  
48  
49  
50  
51  
52  
53  
54  
55  
56  
57  
58  
59  
60

1  
2  
3 **Delivering Dementia Care Differently. Evaluating the differences and similarities**  
4 **between a specialist medical and mental health unit and standard acute care wards: A**  
5 **qualitative study of family carers' perceptions of quality of care.**  
6  
7  
8  
9

10 **ABSTRACT**  
11

12  
13 **Objectives:** To examine in depth carers' views and experiences of the delivery of patient care  
14 for people with dementia or delirium in an acute general hospital, in order to evaluate a  
15 specialist Medical and Mental Health Unit (MMHU) compared with standard hospital wards.  
16  
17

18  
19  
20  
21 **Design:** Qualitative semi-structured interviews were conducted with carers using purposive  
22 sampling.  
23  
24

25  
26 **Setting:** A specialist MMHU was developed in an English National Health Service acute  
27 hospital aiming to deliver best-practice care. Specialist mental health staff were integrated  
28 with the ward team. All staff received enhanced training in dementia, delirium and person-  
29 centred care. A programme of purposeful therapeutic and leisure activities was introduced.  
30 The ward environment was optimised to improve patient orientation and independence. A  
31 proactive and inclusive approach to family carers was encouraged.  
32  
33  
34  
35  
36  
37  
38

39  
40 **Participants:** Forty carers' (20 from MMHU and 20 from standard care wards) who had  
41 been recruited into a Randomised Control Trial comparing the MMHU with standard wards.  
42  
43  
44

45  
46 **Results:** The main themes identified related closely to family carers' met or unmet  
47 expectations and included: activities and boredom; staff knowledge; dignity and fundamental  
48 care; the ward environment; and communication between staff and carers. Carers from  
49 MMHU were aware of, and appreciated, improvements relating to activities, the ward  
50 environment and staff knowledge and skill in the appropriate management of dementia and  
51  
52  
53  
54  
55  
56  
57  
58  
59  
60

1  
2  
3 delirium. However, communication and engagement of family carers was still perceived as  
4  
5 insufficient.  
6  
7

8 **Conclusion:** Our data demonstrates the extent to which the MMHU succeeded in its goal of  
9  
10 providing best practice care and improving carer experience, and where deficiencies  
11  
12 remained. Neither setting was perceived as wholly good or wholly bad, however greater  
13  
14 satisfaction (and less dissatisfaction) with care was experienced by carers' from MMHU  
15  
16 compared with standard care wards.  
17  
18  
19  
20  
21  
22  
23  
24  
25  
26  
27  
28  
29  
30  
31  
32  
33  
34  
35  
36  
37  
38  
39  
40  
41  
42  
43  
44  
45  
46  
47  
48  
49  
50  
51  
52  
53  
54  
55  
56  
57  
58  
59  
60

## ARTICLE SUMMARY

### Article focus

- One in three acute hospital admissions is of a confused older person and in recent years various reports have called for improvements in care for people with dementia and delirium admitted to hospital.
- We interviewed family carers of people with dementia or delirium in an acute general hospital to examine in depth their views and experiences of the delivery of patient care, in order to evaluate a specialist Medical and Mental Health Unit (MMHU) compared with standard hospital wards.

### Key messages

- Family carers identified and appreciated various aspects of care that were introduced as part of a service innovation that aimed to deliver best practice care for acutely ill people with delirium and dementia, including an improved environment, level of patient activity, and staff knowledge and skills, compared with experiences reported from standard care wards. However, communication with staff, especially nurses, and engagement with family carers was still considered unsatisfactory.
- New approaches to communication and engagement with family carers are required, including the assessment of expectations and the giving and receiving of information. Meeting this need will require changes to the way acute wards operate, and the re-prioritisation of staff time to enable this activity.

### Strengths and limitations of this study

- This study was undertaken alongside a randomised controlled trial, so patients and carers were to an extent matched for social and clinical characteristics, and illness severity. Wide-ranging semi-structured interviews permitted exploration of in depth experiences, and uncovered areas of concern for participants that might not have been anticipated in advance.
- The data are limited by coming from a single English National Health Service hospital. Studying the experience of patients with cognitive impairment is difficult because of memory and language problems, and difficulties perceiving time and abstract thought. Family carers are often assumed to be a suitable proxy, but have a partial view of the care delivered to a patient.
- Interviews were done some weeks after hospitalisation, which might influence perceptions and interpretations of experiences, and which aspects of the story were related to the interviewer. Family carers were sometimes interviewed with the patient participant present, which might limit what was said openly. Analysis of qualitative data is open to different interpretations and the possibility of preconception.

1  
2  
3 **Delivering Dementia Care Differently. Evaluating the differences and similarities**  
4 **between a specialist medical and mental health unit and standard acute care wards: A**  
5 **qualitative study of family carers' perceptions of quality of care.**  
6  
7  
8  
9

10 **Introduction**  
11

12  
13 The prevalence of dementia is increasing worldwide.<sup>1</sup> One in three acute hospital admissions  
14 is of a confused older person.<sup>2</sup> In recent years various reports have called for improvements  
15 in care for people with dementia admitted to hospital.<sup>3-7</sup> The Alzheimer's Society<sup>8</sup> identified  
16 key areas of dissatisfaction for carers relating to: a lack of person-centred care (PCC); nurses  
17 not recognising or understanding dementia; a lack of dignity and respect; patients not being  
18 helped to eat and drink; a lack of opportunity for social interaction and not enough carer  
19 collaboration in decision-making. Qualitative research exploring carers' perceptions of acute  
20 hospital care for people with dementia suggest that their experiences are variable. One study  
21 concluded that perceptions of poor care were linked to expectations and relationships with  
22 staff<sup>9</sup> Staff report lacking skills and confidence in caring for confused older people<sup>8,10</sup> Little  
23 previous research has evaluated attempts to improve the quality of care for confused older  
24 people in acute hospitals.  
25  
26  
27  
28  
29  
30  
31  
32  
33  
34  
35  
36  
37  
38  
39

40  
41 A specialist Medical and Mental Health Unit (MMHU) was developed on an acute geriatric  
42 medical ward aiming to provide best practice care for patients with delirium and dementia  
43 following admission to a general hospital for acute medical care<sup>11</sup> The intervention ward  
44 enhanced five aspects of care. Additional specialist staff were employed (mental health  
45 nurses, and mental health specialist occupational, physiotherapist and speech and language  
46 therapists, and a psychiatrist) alongside acute hospital staff. Staff received enhanced training  
47 in dementia, delirium and PCC following the Bradford Dementia Group approach<sup>12-13</sup> using  
48 a combination of didactic and ward-based learning, including co-working with the mental  
49  
50  
51  
52  
53  
54  
55  
56  
57  
58  
59  
60

1  
2  
3 health specialist staff. A programme of purposeful activities matched to retained abilities was  
4 introduced (such as dominoes, quizzes, crafts, ball games, music and reminiscence, getting  
5 dressed and social eating).<sup>14</sup> The ward environment was optimised with the aim of improving  
6 patient orientation and independence. A proactive and inclusive approach to family carers  
7 was encouraged, with more communication, liberal visiting times and the invitation to engage  
8 in day to day care. Patient personal profile documentation was developed to be completed by  
9 family carers. A series of information leaflets were designed and made available to carers.

10  
11  
12  
13  
14  
15  
16  
17  
18  
19 The MMHU was evaluated in a controlled trial that randomised 600 confused patients over  
20 age 65 who had been admitted for emergency medical care to the unit or standard care.<sup>15-16</sup>  
21  
22  
23 Standard care wards comprised 70% acute geriatric medical and 30% general medical wards.  
24  
25  
26 This study suggested improved patient experience and family carer satisfaction, but no  
27 differences in health status outcomes. This qualitative study contributes to the evaluation by  
28 exploring carers' accounts of their experiences of hospital care.  
29  
30  
31

## 32 33 **Methods**

### 34 35 36 *Sampling and Data Collection*

37  
38  
39 Forty family carers were purposively recruited from participants in the randomised control  
40 trial, twenty from each setting, and took part in face-to-face semi-structured interviews.  
41  
42  
43 Carer participants gave written consent for their own involvement in the study. An interview  
44 guide was developed and checked in a pilot interview. Topics included: patient admission and  
45 settling in to the ward; carer relationship with staff; the ward environment; patients' daily  
46 routines such as sleeping, meals, hygiene and activities; privacy and dignity; care and  
47 medical treatment; discharge planning. Participants were encouraged to discuss both what  
48 they considered worked well and not so well. A series of prompts was devised to encourage  
49 participants to elaborate in more detail when asked a general question. Interviews were  
50  
51  
52  
53  
54  
55  
56  
57  
58  
59  
60



1  
2  
3 conducted in the carer's home and consent was obtained to audio record interviews.  
4  
5 Participants were reassured that privacy, confidentiality and identity would be protected. The  
6  
7 interviewer was an experienced medical sociologist, not involved in delivering clinical care.  
8  
9 Approval was received from a research ethics committee and hospital research governance  
10  
11 department. Sampling continued until data saturation was achieved during the analysis of key  
12  
13 themes.  
14

### 15 16 17 *Data Analysis* 18

19  
20 Interviews were transcribed verbatim, and Nvivo 10 software was used to facilitate analysis.  
21  
22 The data were analysed thematically using a framework analysis that allowed a systemic  
23  
24 process to be followed in the development of knowledge and theory.<sup>17</sup> Framework analysis  
25  
26 is a flexible approach utilised in health service research that allows all data to be collected  
27  
28 and then analysed.<sup>18</sup> The organisation of data within this approach involved a five stage  
29  
30 process: 1) familiarization; 2) identifying a thematic framework; 3) indexing; 4) charting; and  
31  
32 5) mapping and interpretation.<sup>17</sup> Familiarization with data involved constant comparison  
33  
34 across data to identify categories and themes. Coding transcripts to identify recurrent  
35  
36 statements and expressed feelings formed the basis of the thematic framework (see, appendix  
37  
38 1). Themes were compared and contrasted between settings via indexing, charting and  
39  
40 mapping to provide a detailed understanding and interpretation of participants' experiences,  
41  
42 and if and how the intervention added to carers' perspectives of quality of care. All authors  
43  
44 met on a regular basis to discuss the development of codes, themes, categories and theories  
45  
46 about the phenomenon being studied.  
47  
48  
49  
50  
51  
52  
53  
54  
55  
56  
57  
58  
59  
60

## Results

### *Participants*

20 carers were interviewed from the MMHU, whose relationship to patients was: two spouses, thirteen daughters, two sons, one brother and two granddaughters. The 20 carers from standard care were: six spouses, six daughters, one granddaughter, five sons, one sister and one nephew. The patients were seven males and thirteen females from MMHU, mean age 87 (range 83-97), and eleven males and nine females from standard care, mean age 85 (range 69-95).

### *Findings*

The themes identified as being important in exploring differences and similarities between participants' experiences of quality of care in the two groups were:

- (1) Activities and boredom;
- (2) Staff knowledge;
- (3) Dementia, dignity and fundamental care;
- (4) Ward environment;
- (5) Communication;
- (6) Carer expectations.

### *Activities and boredom*

Carers from both groups commented on activities offered and whether they perceived that patients experienced boredom. Relatives from MMHU made more references to patients

1  
2  
3 being engaged in activities compared with standard care; half of these relatives were aware,  
4  
5 or appreciative, of patient involvement in activities on the ward:  
6  
7

8 'The activity co-ordinator put on some old tunes in the day room, like Frank Sinatra  
9  
10 everyone was having a bit of a giggle actually, because she loves music and that stuff,  
11  
12 so that's good' (Daughter of 84 year old, female, MMHU patient).  
13  
14

15 Six carers highlighted that patients were too ill to have engaged with activities, or would not  
16  
17 have wanted to be involved in these:  
18  
19

20 'We did see the activity room, and I think, possibly, if he'd been well enough to just  
21  
22 sit in there whilst things were going on, he would have enjoyed that' (Daughter of 95  
23  
24 year old, male, MMHU patient).  
25  
26  
27

28 Four MMHU carers stated that their relative would not have had any lasting memory of  
29  
30 activities, and this meant family members would not have been aware what activities their  
31  
32 relative had been involved with. Others were aware that patients had taken part, and felt that  
33  
34 even if they had no recollection of this, patients had nevertheless enjoyed the activities at the  
35  
36 time, which carers considered positive:  
37  
38  
39

40 'We went in and she was having her hair done, that person [activity coordinator] said  
41  
42 that mum had won the film quiz the night before, and mum couldn't even remember  
43  
44 doing it. What a shame that whenever we ask her, she can't remember having done  
45  
46 anything' (Daughter of 87 year old, female, MMHU patient).  
47  
48  
49

50 Five relatives from standard care commented that there was little stimulus for patients and  
51  
52 some considered that this left patients bored. Others felt that having activities could have  
53  
54 prevented behaviours such as wandering or vocalisation. Some standard care relatives  
55  
56 referred to the need for the kinds of activities that were being offered on MMHU. A few  
57  
58  
59  
60

1  
2  
3 relatives from MMHU were aware of activities, but felt dissatisfaction because their relative  
4  
5 had not had a chance to engage in them.  
6  
7

### 8 *Staff knowledge* 9

10  
11 There were noticeable differences between the two groups relating to staff knowledge of  
12  
13 dementia and delivery of professional care. Carers of MMHU patients described staff as  
14  
15 being 'well prepared' for dealing with confused patients, displaying patience and  
16  
17 compassion. Respondents noted that patients who liked to wander were guided by staff  
18  
19 when walking up and down rather than constantly being returned to their bed space,  
20  
21 behaviour observed by carers on standard care wards. A few respondents praised the support  
22  
23 of mental health nurses on MMHU in defusing situations, although some family carers were  
24  
25 unaware that MMHU had special staffing:  
26  
27

28  
29  
30 'One night Grandma was in quite a strop, she was having a tantrum and a nurse came  
31  
32 over, she didn't have to and I thought it was nice that she came over and she was  
33  
34 trying to calm her. I thought she gave that little bit extra'. (Granddaughter of 91 year  
35  
36 old, female (MMHU) patient).  
37  
38

39  
40 Standard care respondents felt that some staff displayed a negative attitude towards confused  
41  
42 patients. Participants felt that staff had little understanding and limited training in dementia  
43  
44 care which carers felt resulted in patients being ignored, shouted at or threatened when staff  
45  
46 were faced with uncooperative or challenging situations. In some cases this led to  
47  
48 confrontation between nurses and family carers who reacted to what they perceived as  
49  
50 unacceptable staff attitudes towards patients. These carers further highlighted that they  
51  
52 hadn't formally complained for fear of repercussions towards their relative:  
53  
54  
55  
56  
57  
58  
59  
60

1  
2  
3 ‘She [health care assistant] kept shouting at him, turn over, turn over I can’t get to  
4 you. So eventually I opened the curtains and said that man’s confused he can’t  
5 understand you. She [health care assistant] knew I was sitting outside the curtain and  
6 it didn’t deter her, she was really shouting’. (Wife of 69 year old, male, standard care  
7 patient).  
8  
9  
10  
11  
12  
13

14 Carers further described how they felt it necessary to offer individualised support and  
15 guidance to health professionals in dealing with patients, as they considered staff to be  
16 lacking in dementia expertise. Some participants felt they needed to provide one-to-one  
17 personal care as they perceived staff were unable to fulfil this role due to their inexperience.  
18 One carer from standard care commented that staff had inferred that the ward was a ‘mixed  
19 medical ward that was not equipped to deal with dementia patients’ who were considered  
20 time consuming, as staff would have to have ‘extra patience with them’. Some carers  
21 considered offering one-to-one care as an extension of their ‘main carer’ role which  
22 transferred with them from home to hospital:  
23  
24  
25  
26  
27  
28  
29  
30  
31  
32  
33  
34

35 ‘If he was on a ward where they understood him better and would be able to wash and  
36 dress him without me having to go up there, it would have been different’. (Daughter  
37 of 83 year old, male, standard care patient).  
38  
39  
40  
41  
42

#### 43 *Dementia, dignity and fundamental care*

44  
45  
46 For many family carers an important aspect of satisfaction involved fundamental elements of  
47 personal care such as elimination, washing and dressing, eating and drinking. Participants  
48 believed that such personal and intimate care should be delivered sensitively and that  
49 patient’s dignity should be protected. MMHU carers (14) and standard care (10) participants  
50 stated that they witnessed appropriate curtain use that ensured patients received privacy when  
51 needed. Negative comments from four MMHU carers and ten standard care participants  
52  
53  
54  
55  
56  
57  
58  
59  
60

1  
2  
3 considered that their loved ones had received less dignified care. Concerns from MMHU  
4 participants ranged from patients dentures not being cleaned by staff, respondents feeling that  
5 it was inappropriate for male nurses to attend the toileting needs of female patients and a  
6 patient, being discharged 'in her night gown, unwashed and smelling'. Complaints raised by  
7 standard care participants, related to patients being found by visitors with excrement under  
8 their fingernails and used incontinence pads found by patients bed sides. Instances were  
9 mentioned of patients undressing in public bays, toilet doors being left open exposing female  
10 patients to passing male patients and visitors, a patient being found in a wet bed sheets or not  
11 washed. This was considered due to staff inexperience in delivering care to confused patients:  
12  
13  
14  
15  
16  
17  
18  
19  
20  
21  
22  
23

24 'I had to clean her nails because she had excrement all under her fingernails, the  
25 nurse said she'd put her on a bed pan and then caught her getting off, trying to clear it  
26 up'. (Son of 87 year old, female, standard care patient).  
27  
28  
29  
30

31 One standard care patient who had recovered from delirium and who was present during the  
32 interview commented that he had been embarrassed and not wanting to eat to avoid emptying  
33 his bowels after a nurse had not cleaned him properly during a visit to the toilet.  
34  
35  
36  
37

38 Carers from both MMHU (11) and standard care wards (12) expressed satisfaction with the  
39 hospital food, and positive comments related to the quality, menu choice and patients  
40 enjoyment of meals. Participants from across the sample further highlighted that if frail older  
41 patients displayed a poor appetite, hospital staff offered alternative snacks and sandwiches,  
42 which carers appreciated. Five carers of patients on MMHU expressed concern about staff  
43 not assisting patients with eating and drinking. Dissatisfaction expressed from ten standard  
44 care participants mainly related to lack of understanding, help and encouragement with eating  
45 and/or drinking for confused older patients:  
46  
47  
48  
49  
50  
51  
52  
53  
54  
55  
56  
57  
58  
59  
60

1  
2  
3 'She [patient] wasn't drinking sufficiently, they [staff] were giving her a cup of tea  
4  
5 but she couldn't hold it, she'd spill it all down herself. And they [staff] weren't doing  
6  
7 anything to help when it was mealtime, they [staff] put the meals out and they  
8  
9 [patients] seemed to be left to it'. (Son of 93 year old, female, standard care patient).  
10  
11

12  
13 A small number of carers from MMHU (2) and standard care (4) questioned whether  
14  
15 confused older patients were in a position to make menu choices about the food they usually  
16  
17 chose and enjoyed. Carers commented that staff had probably decided on behalf of patients  
18  
19 and would have appreciated more involvement.  
20  
21

### 22 *Ward Environment*

23  
24  
25 Carers from both MMHU and standard care generally described the wards as 'clean and tidy'.  
26  
27 Less positive comments expressed by three carers of patients on standard care related to  
28  
29 décor or minor cleanliness issues. Comments made by relatives from MMHU suggested  
30  
31 carers were appreciative of some of the changes made to the ward environment that involved  
32  
33 improving the décor and personalising patients' surroundings. Carers were also positive  
34  
35 about the day and activities room but very few were aware of the private sensory room.  
36  
37 Some carers also considered the availability of information leaflets to be a helpful  
38  
39 educational resource:  
40  
41  
42

43  
44 'There's more pictures, and that's nice and there's an activities board which is quite  
45  
46 nice as well and there's a bit more colour. They've [patients] all have theses memory  
47  
48 boxes behind the bed. Mum hasn't got anything in there yet, but I've got photos that I  
49  
50 could put in there. (Daughter of 84 year old female MMHU patient).  
51  
52  
53  
54  
55  
56  
57  
58  
59  
60

### *Communication*

Relatives of patients on both MMHU and standard care wards had positive and negative experiences of communication and engagement with ward staff, but in general wanted more regular communication. Carers' perceptions of their relationship with staff closely corresponded with their met or unmet expectations, which were influenced by the level of cognitive impairment and communication difficulties experienced by patients. A similar number of carers of both MMHU (12) and standard care patients (11) described positive experiences, including certain staff being informative, helpful, friendly or approachable. These positive experiences greatly influenced their perceptions of quality of care. However, experiences could vary greatly between staff members and situations that arose during carers' involvement on the ward:

'We saw [the consultant], who was excellent, he was informative, he was helpful, he was sympathetic', but there was one nurse that came across as abrasive and therefore you're a bit wary about asking too many questions, but the auxiliary nurse was lovely.... (Son of 87 year old, female, standard care patient).

Family members who described poor relationships or ineffective communication with staff indicated greater dissatisfaction with the quality of care they experienced. The main grievance cited by carers concerned the lack of being kept informed, which led some to feel neglected and ignored. This point was particularly emphasised by carers who found it difficult or impossible to get information from the patient themselves:

'I mean, if people like my dad are in here because of their age and memory loss really, they [staff] should be talking to the family, shouldn't they? Or somebody should'. (Daughter of 87 year old male, MMHU patient).



1  
2  
3 Some family members believed that staff should voluntarily provide information on patient's  
4 care and progress rather than families feeling obligated to initiate interactions. Carers who  
5 were reluctant to approach staff described feeling anxious about being left uninformed:  
6  
7  
8

9  
10 'I did have to ask to find out what was going on, and I know the ward was busy and  
11 you don't want to interfere with people when they're working sort of, but it's kind of,  
12 when you're feeling that anxious, you just want that little bit more reassurance that,  
13 yes, somebody will come and speak to you'. (Granddaughter of 85 year old, male,  
14 MMHU patient).  
15  
16  
17  
18  
19  
20

21  
22 Lack of communication and information sharing between staff and family carers was also  
23 evident at discharge on both MMHU (9) and standard care (10). Approximately half of the  
24 carers described the discharge experience in a number of negative ways including: delayed,  
25 rushed, and undignified. Carers did appreciate that problems were often beyond the control  
26 of ward staff themselves and related to organisational barriers:  
27  
28  
29  
30  
31  
32

33  
34 'Discharge was a bit belated. Largely because she had to stay there [in hospital] until  
35 the aftercare package with the intermediate care team could be set up to come and  
36 supervise her at home'. (Husband of 75 year old female, MMHU patient).  
37  
38  
39  
40

41  
42 In discussions with carers about whether staff had engaged with them about patients'  
43 backgrounds and interests, both positive and negative comments were noted from  
44 respondents. Half of MMHU carers (10) commented that they had been approached by staff  
45 to complete personal profile documentation about patients' past lives. Many considered that  
46 they were a good idea although a couple of family members mentioned that they had  
47 completed them later than expected, and one respondent speculated whether staff referred to  
48 them or not:  
49  
50  
51  
52  
53  
54  
55  
56  
57  
58  
59  
60

1  
2  
3 'I filled one form in I answered, you know, her interests, what she enjoyed doing, I do  
4 think it's a good idea. The girl [nurse] that gave me the form said it was, to help them  
5 understand the person, to get to know the lady in the bed'. (Daughter of 87 year old,  
6 female, MMHU patient).  
7  
8  
9  
10

11  
12 Staff on standard care wards did not routinely complete personal profile documentation with  
13 family carers, but respondents were asked if they felt staff had got to know any background  
14 information about patients. Most (15) family carers from standard care commented that staff  
15 had not enquired about patients' personal lives other than past medical history (compared  
16 with four MMHU participants). A few participants considered that it would be difficult for  
17 nurses to get to know patients due to the short length of stay in an acute setting and lack of  
18 continuity in care due to shift length and patterns. Some family carers felt that nurses were  
19 too busy to have much interaction with patients and that conversation would focus around  
20 general tasks such as giving injections, changing drips and other medical treatments:  
21  
22  
23  
24  
25  
26  
27  
28  
29  
30  
31  
32

33 'They [nurses] had conversations with me...what she'd been up to, but not much  
34 conversation about her past or anything like that'. (Granddaughter of 98 year old,  
35 female, standard care patient).  
36  
37  
38  
39  
40

#### 41 *Carer Expectations*

42

43  
44 Relatives' expectations of the quality of care they presumed patients would receive on the  
45 ward (formed prior to patient admission) compared with actual experiences (determined by  
46 perceptions formed during and after discharge) influenced their satisfaction with the ward.  
47  
48 The five themes identified in this analysis (activities, staff knowledge, fundamental care,  
49 ward environment and communication) all related to expectations, which formed a cross-  
50 cutting theme. In order to examine unmet expectations, participants were asked to make  
51 suggestions about what future improvements could be made to the ward. Several family  
52  
53  
54  
55  
56  
57  
58  
59  
60

1  
2  
3 carers MMHU (6) and standard care (7) highlighted aspects of communication and  
4  
5 collaboration between staff and carers:  
6  
7

8 'I would like it if they [staff] came and introduced themselves. So if they haven't seen  
9  
10 you before, then you're sat by your mother's bed, they should come over and say,  
11  
12 well, I'm the ward sister, or I'm the daily nurse who's looking after her, you know,  
13  
14 sorting her washing [needs] and things like that'. (Son of 93 year old, female,  
15  
16 MMHU patient).  
17  
18

19  
20 Further suggestions included: more patient stimulation, carers being present during ward  
21  
22 rounds, longer visiting hours, having a named nurse, receiving a daily briefing from staff, a  
23  
24 daily diary or check lists for carers, and separate bays for more vocal patients. Family carers  
25  
26 from MMHU and standard care wards had a variety of unique expectations that closely  
27  
28 related to their satisfaction or dissatisfaction with care:  
29  
30

31  
32 'I think it's a lot better for the patient if there's continuity with the same person,  
33  
34 because then you do get to know that patient a lot, a lot better. But it probably won't  
35  
36 work in a hospital situation where I know it's not going to be a one to one situation. It  
37  
38 never will be, because the NHS can't afford it'. (Son of 89 year old, male, standard  
39  
40 care patient).  
41  
42

43  
44 'I thought he would have been better with mental nurse looking after him. To  
45  
46 understand him better, understand his needs, do you know what I mean? Rather than  
47  
48 them saying to me, Well, we've tried to talk to your dad this morning and he's just not  
49  
50 having none of it, he's a bit confused....No, he's not confused, he's got dementia,  
51  
52 he's ill. You know, he's got vascular dementia'. (Daughter of 84 year old, male,  
53  
54 standard care patient).  
55  
56  
57  
58  
59  
60

## Discussion

This qualitative study evaluated an intervention which aimed to improve care for patients with dementia and delirium admitted to an acute hospital. The main themes identified in exploring carer satisfaction related closely to their met or unmet expectations and included: activities and boredom; staff knowledge; dignity and fundamental care; the ward environment; and communication between staff and carers. Neither setting was perceived as wholly good or wholly bad, however greater satisfaction (and less dissatisfaction) with care was experienced by carers' from MMHU compared with standard care wards. Meeting patients' expectations are seen as an important factor in higher satisfaction with patient care.

<sup>19</sup> Clearly developing awareness of carers' expectations/unmet expectations should enable nursing staff to understand the carers' perspective and improve communication as well as satisfaction. Carers were aware of improvements relating to activities, the ward environment and staff knowledge and awareness of the appropriate management of dementia and delirium. However, in some cases communication and engagement of family carers was still perceived as insufficient.

The MMHU development was an ambitious attempt to overcome previously identified problems with acute hospital care by acknowledging and attempting to address, a lack of knowledge and skills, a bland and disorientating environment, a lack of therapeutic and diversionary activity and better communication and engagement with family carers. <sup>11</sup> The underlying philosophy was that of PCC, which has been advocated over the past decade in order to enhance well-being for people with dementia and to avoid distress and associated disturbed behaviours. PPC aims to support emotional and psychological needs by valuing people with dementia and treating them as individuals, by looking at the world from the perspective of the person with dementia and by creating a positive social environment. <sup>20, 13</sup>

There are various descriptions of PCC and no consensus on its definition or how to apply it

1  
2  
3 during acute illness.<sup>21-22</sup> Biographical information can be used to promote knowledge of the  
4 person with dementia such as family, occupation, hobbies, likes and dislikes and can help  
5 staff focus on the person as an individual.<sup>23</sup> Personalising dementia patients' surroundings  
6 has been associated with positive effects on behaviour and mood as well as improved  
7 orientation.<sup>24-25,4</sup> Meaningful activity such as reminiscence, games and crafts can foster  
8 social interaction between staff and patients<sup>20,26-27</sup> whilst dressing and social eating provide a  
9 sense of purpose and dignity, and maintains necessary basic daily skills. However, hospitals  
10 are busy, fast-moving and noisy, making them difficult places for people with dementia.<sup>7</sup>  
11 Patients are often ill and dependent<sup>2, 28</sup> and physical medical care is necessarily prioritised.  
12 The necessary medical monitoring and nursing interventions can be misunderstood or seen as  
13 threatening. Length of stay is typically short. These factors limit the scope for delivering PCC  
14 and family engagement.<sup>29</sup>  
15  
16  
17  
18  
19  
20  
21  
22  
23  
24  
25  
26  
27  
28  
29

30 The central role of family carers as stakeholders in the care of people with dementia has been  
31 emphasised many times.<sup>30-32</sup> Carers' experiences of the wards were mediated by many  
32 factors related to the severity of the patients' illness, duration of stay, past experience of  
33 hospitalisation, the length of time spent visiting the ward, their expectations of the care the  
34 ward could provide, competing commitments and carer strain.<sup>33</sup> Family carers wanted an  
35 even greater level of communication and engagement than was achieved on MMHU, despite  
36 this being an explicit goal on the unit (a finding also reported by Li *et al*<sup>34</sup>). Carers were  
37 appreciative when involved in aspects of their relative's care but disillusioned when they felt  
38 excluded or neglected. Relationships between staff (especially nurses) and relatives still need  
39 reforming with more partnership and collaboration. Few previous studies have reported  
40 attempts at improvement, and rigorous evaluation is difficult in this field.<sup>35-36</sup> Collaboration,  
41 in terms of shared decision-making and exchange of knowledge and information has been  
42 shown to be particularly important for relatives' satisfaction with hospital care of older  
43  
44  
45  
46  
47  
48  
49  
50  
51  
52  
53  
54  
55  
56  
57  
58  
59  
60

1  
2  
3 people.<sup>37</sup> Organisational factors have also been identified as impeding the development of  
4  
5 effective nurse-family collaboration include; a task focused culture and workload; the  
6  
7 organisations' focus on risk; shift patterns and length; a lack of training; poor supervision;  
8  
9 resistance to change and bureaucratic issues.<sup>38,10</sup>  
10

### 11 12 13 **Strengths and limitations**

14  
15 This study was undertaken alongside a randomised controlled trial, so patients and carers  
16  
17 were to an extent matched for social and clinical characteristics, and illness severity. Wide-  
18  
19 ranging semi-structured interviews permitted exploration experiences in depth, and  
20  
21 uncovered areas of concern for participants that might not have been anticipated in advance.  
22  
23 The data are limited by coming from a single English National Health Service hospital, but  
24  
25 the hospital provided sole emergency medical services for its local population, and is likely to  
26  
27 be representative. Studying the experience of patients with cognitive impairment is difficult  
28  
29 because of memory and language problems, and difficulties perceiving time and abstract  
30  
31 concepts. Family carers are often assumed to be a suitable proxy, but have a very partial view  
32  
33 of the care delivered to a patient. Indeed, they are often aware of this limitation, and it can be  
34  
35 a source of anxiety to them. Interviews were done some weeks after hospitalisation, which  
36  
37 might influence perceptions and interpretations of experiences, and which aspects of the story  
38  
39 were related to the interviewer. Family carers were sometimes interviewed with the patient  
40  
41 participant present, which might limit what was said openly. Analysis of qualitative data is  
42  
43 open to different interpretations and the possibility of preconception.  
44  
45  
46  
47  
48

### 49 50 **Conclusion**

51  
52 Critical reports focusing on dignity and nutrition standards for older patients have prompted  
53  
54 an additional focus on patient and carer satisfaction as well as clinical outcomes and safety.<sup>39</sup>  
55  
56 Our findings support recent initiatives to improve care in hospitals.<sup>40</sup> Dementia 2012: A  
57  
58  
59  
60

1  
2  
3 national challenge calls for improvements in the general hospital care of people with  
4 dementia including a better prepared workforce.<sup>41</sup> The enhancements of care on the MMHU  
5 that included enhanced training in dementia, delirium and PCC helped staff deliver dementia  
6 care differently and more appropriately and this study provides evidence of its effectiveness.  
7  
8 However, the amount of communication required by family carers cannot be underestimated.  
9  
10 We found the extent of this surprising and beyond what we had planned for. New approaches  
11 to engagement with family carers are required, including the assessment of expectations and  
12 the giving and receiving of information. Meeting this need will require major changes to the  
13 way acute wards operate, and the re-prioritisation of staff time to enable this activity.  
14  
15 Facilitating more hands-on care by family members may provide the *quid pro quo* to enable it  
16 within resource-constrained healthcare systems. Organisational development methodologies  
17 should be explored in future attempts to implement such changes, alongside more staff-  
18 directed education and training interventions, and incorporation in pre-registration education.  
19  
20 Nurse leaders will play an important role in creating conditions and fostering a culture that  
21 rewards and raises the demand of delivering ‘relationship-centred’ care for this population.<sup>31</sup>  
22  
23  
24  
25  
26  
27  
28  
29  
30  
31  
32  
33  
34  
35  
36  
37  
38  
39

40 ACKNOWLEDGEMENTS AND DISCLAIMER: This paper presents independent research funded  
41 by the National Institute for Health Research (NIHR) under its Programme Grants for Applied  
42 Research funding scheme (RP-PG-0407-10147). The views expressed are those of the authors and not  
43 necessarily those of the National Health Service, the NIHR or the Department of Health. The funders  
44 and study sponsors had no role in study design, collection, analysis and interpretation of data; writing  
45 the manuscript; or the decision to submit for publication. The Medical Crises in Older People study  
46 group also included Justine Schneider, Simon Conroy, Anthony Avery, Judi Edmans, Adam Gordon,  
47 Bella Robbins, Jane Dyas, Pip Logan, Rachel Elliott, Matt Franklin.  
48  
49  
50  
51  
52  
53  
54  
55

56  
57 CONFLICT OF INTEREST: None.  
58  
59  
60

1  
2  
3 ETHICAL APPROVAL: The study was approved by the Nottingham research ethics committee.  
4

5  
6 CONTRIBUTORS. RH and KS conceived the study. SG, PF and KW managed the trial and  
7  
8 recruited the participants. KS undertook the interviews, and coded the data. All authors  
9  
10 discussed the coding, and interpretation. KS drafted the manuscript, which was revised by  
11  
12 RH, and approved by all authors. KS is guarantor.  
13

14  
15 DATA SHARING: No additional data available.  
16  
17  
18  
19  
20  
21  
22  
23  
24  
25  
26  
27  
28  
29  
30  
31  
32  
33  
34  
35  
36  
37  
38  
39  
40  
41  
42  
43  
44  
45  
46  
47  
48  
49  
50  
51  
52  
53  
54  
55  
56  
57  
58  
59  
60



## References

1. World Health Organization (WHO). Dementia: a public health priority. 2012.  
[http://www.apps.who.int/iris/bitstream/10665/75263/1/9789241564458\\_eng.pdf](http://www.apps.who.int/iris/bitstream/10665/75263/1/9789241564458_eng.pdf).
2. Goldberg, S.E., Whittamore, K., Harwood, R.H., Bradshaw, L., Gladman, J., Jones, R.G. The prevalence of mental health problems amongst older adults admitted as an emergency to a general hospital. *Age and Ageing*, 2012; 41, 80-86, doi:  
[10.1093/ageing/afr106](https://doi.org/10.1093/ageing/afr106).
3. Royal College of Psychiatrists. Who cares wins: Improving the outcomes for older people admitted to the general hospital: Guidelines for the development of Liaison Mental Health Services for older people. London 2005.  
<http://www.rcpsych.ac.uk/pdf/whocareswins.pdf>.
4. Royal College of Psychiatrists. Report of the National Audit of Dementia Care in General Hospital. Editors: Young, J., Hood, C., Woolley, R., Gandesha, A. & Souza, R. London: Healthcare Quality Improvement Partnership. 2011.  
<http://www.rcpsych.ac.uk/pdf/NATIONAL%20REPORT%20-%20Full%20Report%201201122.pdf>.
5. Department of Health. Living Well With Dementia: A National Dementia Strategy: A National Dementia Strategy. Department of Health. London. 2009.  
<https://www.gov.uk/government/publications/living-well-with-dementia-a-national-dementia-strategy>.
6. Department of Health. Quality outcomes for people with dementia: Building on the work of the national dementia strategy. Department of Health. London. 2010.  
<https://www.gov.uk/government/publications/quality-outcomes-for-people-with-dementia-building-on-the-work-of-the-national-dementia-strategy>.

- 1  
2  
3 7. Royal College of Nursing. Improving quality of care for people with dementia in  
4  
5 general hospitals. RCN, London. 2010.  
6  
7 <http://nursingstandard.rcnpublishing.co.uk/shared/cms/file.asp?e=35&i=172190>.  
8  
9
- 10 8. Alzheimer's Society. Counting the cost: Caring for people with dementia in hospital  
11  
12 ward. Alzheimer's Society. London. 2009.  
13  
14 <http://www.alzheimers.org.uk/countingthecost>  
15
- 16 9. Jurgens, F., Clissett, P., Gladman, J.R.F. & Harwood, R.H. Why are family carers of  
17  
18 people with dementia dissatisfied with general hospital care? A qualitative study.  
19  
20 *BMC Geriatrics*. 2012; 12:57, 1-10; doi: 10.1186/1471-2318-12-57.  
21  
22
- 23 10. Gladman, J., Porock, D., Griffiths, A, Clissett, P., Harwood, R.H., Knight A.,  
24  
25 Kearney, F. Care of Older people with Cognitive Impairment in General Hospitals.  
26  
27 Final report NIHR Service Delivery and Organisation Programme. 2012.  
28  
29 <http://www.netsec.ac.uk/hsdr/projdetails.php?ref=08-1809-227>.  
30  
31
- 32 11. Harwood, R.H., Porock, D., King, N., Edwards, G., Hammond, S., Howe,  
33  
34 L.,...Morrant, J.D. Development of a specialist medical and mental health unit for  
35  
36 older people in an acute general hospital. University of Nottingham Medical Crises in  
37  
38 Older People discussion paper series. 2010. Issue 5, 1-46. ISSN 2044-4230.  
39  
40 <http://nottingham.ac.uk/mcop/documents/papers/mcop-issn2044-4230-issue5.pdf>.  
41  
42
- 43 12. Kitwood T. Dementia Reconsidered: The person comes first. Open University Press,  
44  
45 Buckingham. 1997.  
46
- 47 13. Brooker, D. Person-centred dementia care. Jessica Kingsley Publishers, London &  
48  
49 Philadelphia . 2007.  
50
- 51 14. Pool, J. The Pool Activity level (PAL) instrument for occupational profiling: a  
52  
53 practical resource for people with cognitive impairments: 3<sup>rd</sup> ed. Jessica King  
54  
55 Publishers, London. 2008.  
56  
57  
58  
59  
60

- 1  
2  
3  
4  
5  
6  
7  
8  
9  
10  
11  
12  
13  
14  
15  
16  
17  
18  
19  
20  
21  
22  
23  
24  
25  
26  
27  
28  
29  
30  
31  
32  
33  
34  
35  
36  
37  
38  
39  
40  
41  
42  
43  
44  
45  
46  
47  
48  
49  
50  
51  
52  
53  
54  
55  
56  
57  
58  
59  
60
15. Harwood, R.H., Goldberg, S.E., Whittamore, K.H., Russell, C., Gladman, J., Jones, R.G.,...L.E., Elliott, R.A. and Medical Crises in Older People Study Group (MCOP). Study protocol. 2011. Evaluation of a Medical and Mental Health Unit compared with standard care for older people whose emergency admission to an acute general hospital is complicated by concurrent 'confusion': a controlled clinical trial. *Trials*, 12:123. 1-11. doi:10.1186/1745-6215-12-123. <http://www.trialsjournal.com/content/12/1/123>.
16. Goldberg, S.E., Bradshaw, L.E., Kearney, F.C., Russell, C., Whittamore, K., Foster, P. Harwood, R.H. (2013). Care in a specialist Medical and Mental Health Unit compared with standard care for older people with cognitive impairment admitted to a general hospital: a randomised controlled trial (NIHR TEAM trial). *BMJ* 2013; 347 doi: <http://dx.doi.org/10.1136/bmj.f4132>.
17. Ritchie, J., Spencer, L. Qualitative data analysis for applied policy research. In 'Analyzing Qualitative Data'. Edited by Bryman, A., Burgess, R.G. London: Routledge. 1994.
18. Srivastava, A. & Thomson, S.B. Framework analysis: a qualitative methodology for applied policy research. *Journal of Administration & Governance*. 2009; 4,2, 72-79. [http://www.joaag.com/uploads/06\\_Research\\_Note\\_Srivastava\\_and\\_Thomson\\_4\\_2\\_.pdf](http://www.joaag.com/uploads/06_Research_Note_Srivastava_and_Thomson_4_2_.pdf).
19. Rozenblum, R., Lisby, M., Hockley, P.M., Levitizion-Korach, O., Salzberg C.A., Lipsitz, S., Bates, D.W. Uncovering the blind spot of patient satisfaction: an international survey. *BMJ Qual Saf*, 2011; 20, 959-965. doi:10.1136/bmjqs-2011-000306.

- 1  
2  
3 20. Brooker, D. What is person-centred care in dementia? *Reviews in Clinical*  
4  
5 *Gerontology*, 2003; 13,3, 215-222.  
6  
7 <http://journals.cambridge.org/action/displayAbstract?fromPage=online&aid=230595>.  
8  
9  
10 21. Edvardsson, D., Winblad, B., Sandman, P.O. Person-centred care of people with  
11  
12 severe Alzheimer's disease: current status and ways forward. *Lancet Neurol*, 2008; 4,  
13  
14 362-7. doi:10.1016/S1474-4422(08)70063-2.  
15  
16 22. Clissett, P., Porock, D., Harwood, R.H., Gladman J. The challenges of achieving  
17  
18 person-centred care in acute hospitals: a qualitative study of people with dementia and  
19  
20 their families. *International Journal of Nursing Studies*. 2013; (11):1495-503. doi:  
21  
22 10.1016/j.ijnurstu.2013.03.001. <http://dx.doi.org/10.1016/j.ijnurstu.2013.03.001>  
23  
24  
25 23. Clarke, A., Hanson, E. J. & Ross, H. Seeing the person behind the patient:  
26  
27 enhancing the care of older people using a biographical approach, *Journal of*  
28  
29 *Clinical Nursing*, 2003; 12, 697-706.  
30  
31 <http://www.ncbi.nlm.nih.gov/pubmed/12919216>.  
32  
33  
34 24. Day, K., Carreon, D. & Stump, C. The therapeutic design of environments for people  
35  
36 with dementia. *The Gerontologist*. 2000; 40, 4, 397-416.  
37  
38 <http://www.ncbi.nlm.nih.gov/pubmed/10961029>.  
39  
40  
41 25. Lawton, M. P. The physical environment of the person with Alzheimer's disease.  
42  
43 *Aging & Mental Health*, 2001; 5(2), 56-64.  
44  
45 <http://www.ncbi.nlm.nih.gov/pubmed/11513499>.  
46  
47  
48 26. Overshott, R., Burns, A., Winblad, B. Non-pharmacological treatment of severe  
49  
50 dementia: An Overview. (Eds.). This is chapter 13 in '*Severe dementia*' John,  
51  
52 Wiley & Sons Ltd. Chichester. 2006;.164-175. doi: 10.1002/0470010568.ch13.  
53  
54  
55 27. Edvardsson, D., Fetherstonhaugh, D., Nay, R. (2010). Promoting a continuation  
56  
57 of self and normality: person-centred care as described by people with dementia,  
58  
59  
60

- 1  
2  
3 their family members and aged care staff. *Journal of Clinical Nursing*, 19, 2611-  
4  
5 2618. doi: [10.1111/j.1365-2702.2009.03143.x](https://doi.org/10.1111/j.1365-2702.2009.03143.x)  
6  
7  
8 28. Whittamore, K.H., Goldberg, S.E., Gladman, J., Bradshaw, L.E., Jones, R.G.,  
9  
10 Harwood, R.H. (2013). The diagnosis, prevalence and outcome of delirium in a  
11  
12 cohort of older people with mental health problems on general hospital wards.  
13  
14 *International Journal of Geriatric Psychiatry*, doi: [10.1002/gps.3961](https://doi.org/10.1002/gps.3961).  
15  
16  
17 29. Borbasi, S., Jones, J., Lockwood, C., Emden, C. Health professionals' perspectives of  
18  
19 providing care to people with dementia in the acute setting: Toward better practice.  
20  
21 *Geriatric Nursing*, 2006, 27,5, 300-8.  
22  
23 <http://www.ncbi.nlm.nih.gov/pubmed/17045129>.  
24  
25  
26 30. Adams, T. & Gardiner, P. Communication and interaction within dementia care  
27  
28 triads. Developing a theory for relationship person-centred care. *Dementia*, 2005;  
29  
30 4 (2), 185-205. doi: [10.1177/1471301205051092](https://doi.org/10.1177/1471301205051092).  
31  
32  
33 31. Nolan, M.R., Davies, S., Brown, J., Keady, J., Nolan, J. (2004). Beyond person-  
34  
35 centered care: a new vision for gerontological nursing. *J Clin Nurs*.2004; 13,3a,45-53.  
36  
37 [http://www.ssiacymru.org.uk/resource/9\\_n\\_Beyond\\_Person\\_Centred\\_Care.pdf](http://www.ssiacymru.org.uk/resource/9_n_Beyond_Person_Centred_Care.pdf).  
38  
39  
40 32. Tolson, D., Smith, M., Knight ,P. An investigation of the components of best nursing  
41  
42 practice in the care of acutely ill hospitalized older patients with coincidental  
43  
44 dementia: a multi-method design. *Journal of Advanced Nursing*, 1999; 30, 1127-36.  
45  
46 <http://onlinelibrary.wiley.com/doi/10.1046/j.1365-2648.1999.01194.x/pdf>.  
47  
48  
49 33. Bradshaw, L.E., Goldberg, S.E., Schneider, J.M., Harwood, R.H. (2012). Carers' for  
50  
51 older people with co-morbid cognitive impairment in general hospital: characteristics  
52  
53 and psychological well-being. *Int J Geriatr Psychiatry*, 2013; 28(7):681-90. doi:  
54  
55 [10.1002/gps.3871](https://doi.org/10.1002/gps.3871).  
56  
57  
58  
59  
60

- 1  
2  
3 34. Li, H., Powers, B.A., Melnyk, B.M., McCann, R., Koulouglioti, C., Anson, E., Smith,  
4  
5 J.A. ...Tu, X. Randomized Controlled Trial of CARE: An Intervention to Improve  
6  
7 Outcomes of Hospitalized Elders and Family Caregivers. *Research in Nursing &*  
8  
9 *Health*, 2012; 35, 533–549. doi: 10.1002/nur.21491.  
10  
11  
12 35. Waller, S. (2012). Redesigning wards to support people with dementia in hospital.  
13  
14 *Nursing Older People*. 24,2, 16-21.  
15  
16 [http://nursingolderpeople.rcnpublishing.co.uk/archive/article-redesigning-wards-](http://nursingolderpeople.rcnpublishing.co.uk/archive/article-redesigning-wards-to-support-people-with-dementia-in-hospital)  
17  
18 [to-support-people-with-dementia-in-hospital.](http://nursingolderpeople.rcnpublishing.co.uk/archive/article-redesigning-wards-to-support-people-with-dementia-in-hospital)  
19  
20  
21 36. Nufer, T.W., Spichiger, E. How family carers of people with dementia experienced  
22  
23 their stay on an acute care facility and their own collaboration with professionals: a  
24  
25 qualitative study. *Pflege*. 2011; 24, 4, 229-37. doi: 10.1024/1012-5302/a000130.  
26  
27  
28 37. Lindhardt, T., Nyber, P., Hallberg, I.R. Collaboration between relatives of elderly  
29  
30 patients and nurses and it's relation to satisfaction with the hospital care  
31  
32 trajectory. *Scand J Caring Sci*. 2008; 22,4, 507-19. doi: 10.1111/j.1471-  
33  
34 [6712.2007.00558.x](https://doi.org/10.1111/j.1471-6712.2007.00558.x).  
35  
36  
37 38. Tadd, W., Hillman, A., Calnan, S., Calnan, M., Bayer, T., Read, S., Dignity in  
38  
39 Practice: An exploration of the care of older adults in acute NHS Trusts. (A  
40  
41 research summary). NIHR Service Delivery and Organisation Programme. 2011.  
42  
43 [www.sdo.nihr.ac.uk/projdetails.php?ref=08-1819-218](http://www.sdo.nihr.ac.uk/projdetails.php?ref=08-1819-218).  
44  
45  
46 39. Care Quality Commission. Dignity and nutrition inspection programme: National  
47  
48 overview. 2011.  
49  
50 [http://www.cqc.org.uk/sites/default/files/media/documents/20111007\\_dignity\\_and](http://www.cqc.org.uk/sites/default/files/media/documents/20111007_dignity_and_nutrition_inspection_report_final_update.pdf)  
51  
52 [\\_nutrition\\_inspection\\_report\\_final\\_update.pdf](http://www.cqc.org.uk/sites/default/files/media/documents/20111007_dignity_and_nutrition_inspection_report_final_update.pdf).  
53  
54  
55  
56  
57  
58  
59  
60

1  
2  
3 40. Royal College Nursing (RCN). Dementia: Commitment to the care of people with  
4 dementia in hospital settings. London. 2013.

5  
6  
7 [http://www.rcn.org.uk/\\_data/assets/pdf\\_file/0011/480269/004235.pdf](http://www.rcn.org.uk/_data/assets/pdf_file/0011/480269/004235.pdf).

8  
9  
10 41. Alzheimer's Society. Dementia 2012: A national challenge. London. Alzheimer's  
11 Society. 2012. <http://www.alzheimers.org.uk/dementia2012>.

12  
13  
14  
15  
16  
17  
18  
19  
20  
21  
22  
23  
24  
25  
26  
27  
28  
29  
30  
31  
32  
33  
34  
35  
36  
37  
38  
39  
40  
41  
42  
43  
44  
45  
46  
47  
48  
49  
50  
51  
52  
53  
54  
55  
56  
57  
58  
59  
60

For peer review only

1  
2  
3 **Appendix 1: Themes identified from interviews with family carers of hospital patients**  
4  
5 **with dementia**  
6

| Categories                              | Theme                                                                                                                                                                                                          |
|-----------------------------------------|----------------------------------------------------------------------------------------------------------------------------------------------------------------------------------------------------------------|
| Caring for people with Dementia         | Staff knowledge of dementia<br>Staff attitudes towards people with dementia<br>Appropriate delivery of dementia care<br>Inexperienced in delivering dementia care                                              |
| Communication with health professionals | Being informed<br>Carer expectations<br>Hospital staff approachable<br>Carers' questions answered<br>Staff distant<br>Staff approached carers<br>Personal profile documentation                                |
| Treatment                               | Medical treatment<br>Fundamental nursing care<br>Toileting issues<br>Safety and protection<br>Night time issues<br>Admission<br>End of life care<br>Discharge arrangements<br>Care package<br>Meals and eating |



|                        |                                   |
|------------------------|-----------------------------------|
|                        | Pain relief                       |
| Activities and boredom | Appreciate of activities offered  |
|                        | Little stimulus for patients      |
|                        | Too ill to engage in activities   |
|                        | Boredom                           |
| Ward environment       | Decor and cleanliness             |
|                        | Personalised patient surroundings |
|                        | Day room                          |
|                        | Sensory room                      |
|                        | Ward being special                |
| Family carers          | Relationship to the patient       |
|                        | Visiting times                    |
|                        | Involved in hospital care         |
|                        | Carer concerns                    |
|                        | Improving care                    |

---

# Consolidated criteria for reporting qualitative research (COREQ): a 32-item checklist for interviews and focus groups

**Table 1**

Consolidated criteria for reporting qualitative studies (COREQ): 32-item checklist

| No                                                                                                                                         | Item                                        | Guide questions/description                                 |
|--------------------------------------------------------------------------------------------------------------------------------------------|---------------------------------------------|-------------------------------------------------------------|
| <b>Domain 1:<br/>Research team<br/>and reflexivity</b>                                                                                     |                                             |                                                             |
| Personal                                                                                                                                   |                                             |                                                             |
| Characteristics                                                                                                                            |                                             |                                                             |
| 1.                                                                                                                                         | Interviewer/facilitator<br>or focus group?  | Which author/s conducted the interview                      |
| <b>First author</b>                                                                                                                        |                                             |                                                             |
| 2.                                                                                                                                         | Credentials<br>E.g. PhD, MD                 | What were the researcher's credentials?                     |
| <b>First author MA, PhD, second author MA, third author MPhil, fourth author, PhD, Fifth author Consultant Geriatrician/Professor.</b>     |                                             |                                                             |
| 3.                                                                                                                                         | Occupation                                  | What was their occupation at the time of the study?         |
| <b>1. Research Fellow, 2. Research Associate, 3. Clinical Researcher. 4. Senior Research Fellow. 5. Consultant Geriatrician/Professor.</b> |                                             |                                                             |
| 4.                                                                                                                                         | Gender                                      | Was the researcher male or female?                          |
| <b>Authors 1,2, 3, 4 female, Author 5 male.</b>                                                                                            |                                             |                                                             |
| 5.                                                                                                                                         | Experience and training<br>researcher have? | What experience or training did the researcher have?        |
| <b>All author has done previous qualitative projects and attended several trainings and workshops.</b>                                     |                                             |                                                             |
| <b>Relationship with participants</b>                                                                                                      |                                             |                                                             |
| 6.                                                                                                                                         | Relationship established                    | Was a relationship established prior to study commencement? |
| <b>Relationships were not established prior to interviews.</b>                                                                             |                                             |                                                             |

| No | Item                                                                                                        | Guide questions/description              |
|----|-------------------------------------------------------------------------------------------------------------|------------------------------------------|
| 7. | Participant knowledge of the interviewer<br>researcher? e.g. personal goals, reasons for doing the research | What did the participants know about the |

**Personal interest in research and reasons for doing it were described prior to the interviews.**

|    |                                                                                                                                  |                                          |
|----|----------------------------------------------------------------------------------------------------------------------------------|------------------------------------------|
| 8. | Interviewer characteristics of the interviewer/facilitator? e.g. Bias, assumptions, reasons and interests in the research topic. | What characteristics were reported about |
|----|----------------------------------------------------------------------------------------------------------------------------------|------------------------------------------|

**Descriptions of interviewers experience of approaches including references to publicly available written work.**

**Domain 2:  
study design**

Theoretical  
framework

|    |                                       |                                                                                                                                                          |
|----|---------------------------------------|----------------------------------------------------------------------------------------------------------------------------------------------------------|
| 9. | Methodological orientation and Theory | What methodological orientation was stated to underpin the study? e.g. grounded theory, discourse analysis, ethnography, phenomenology, content analysis |
|----|---------------------------------------|----------------------------------------------------------------------------------------------------------------------------------------------------------|

**Constant Comparison / Thematic Framework analysis.**

Participant  
selection

|     |          |                                                                                     |
|-----|----------|-------------------------------------------------------------------------------------|
| 10. | Sampling | How were participants selected? e.g. purposive, convenience, consecutive, snowball. |
|-----|----------|-------------------------------------------------------------------------------------|

**Purposive.**

|     |                                                            |                                        |
|-----|------------------------------------------------------------|----------------------------------------|
| 11. | Method of approach<br>face-to-face, telephone, mail, email | How were participants approached? e.g. |
|-----|------------------------------------------------------------|----------------------------------------|

**Face to face**

|     |                       |                                   |
|-----|-----------------------|-----------------------------------|
| 12. | Sample size<br>study? | How many participants were in the |
|-----|-----------------------|-----------------------------------|

**40**

|     |                                               |                                        |
|-----|-----------------------------------------------|----------------------------------------|
| 13. | Non-participation<br>or dropped out? Reasons? | How many people refused to participate |
|-----|-----------------------------------------------|----------------------------------------|

| No  | Item                                                                                          | Guide questions/description                                |
|-----|-----------------------------------------------------------------------------------------------|------------------------------------------------------------|
|     | <b>Four refused the invitation to participate. Reasons were not sought. None dropped out.</b> |                                                            |
|     | Setting                                                                                       |                                                            |
| 14. | Setting of data collection                                                                    | Where was the data collected? e.g. home, clinic, workplace |

**In a place selected by participants. Usually home or a suitable room at the hospital.**

|     |                             |                                                                   |
|-----|-----------------------------|-------------------------------------------------------------------|
| 15. | Presence of nonparticipants | Was anyone else present besides the participants and researchers? |
|-----|-----------------------------|-------------------------------------------------------------------|

**Yes Hospital patient related to family carer interviewed.**

|     |                       |                                                                                   |
|-----|-----------------------|-----------------------------------------------------------------------------------|
| 16. | Description of sample | What are the important characteristics of the sample? e.g. demographic data, date |
|-----|-----------------------|-----------------------------------------------------------------------------------|

**Demographic data described i.e. how carer was related to the hospital patient and gender.**

Data collection

|     |                 |                                                                               |
|-----|-----------------|-------------------------------------------------------------------------------|
| 17. | Interview guide | Were questions, prompts, guides provided by the authors? Was it pilot tested? |
|-----|-----------------|-------------------------------------------------------------------------------|

**There was not pilot testing. Interview approach is described in the methods section.**

|     |                   |                                                       |
|-----|-------------------|-------------------------------------------------------|
| 18. | Repeat interviews | Were repeat interviews carried out? If yes, how many? |
|-----|-------------------|-------------------------------------------------------|

**No. Not part of the study design.**

|     |                        |                                                                     |
|-----|------------------------|---------------------------------------------------------------------|
| 19. | Audio/visual recording | Did the research use audio or visual recording to collect the data? |
|-----|------------------------|---------------------------------------------------------------------|

**Data was audio recorded.**

|     |             |                                                                         |
|-----|-------------|-------------------------------------------------------------------------|
| 20. | Field notes | Were field notes made during and/or after the interview or focus group? |
|-----|-------------|-------------------------------------------------------------------------|

**Yes.**

No Item Guide questions/description

21. Duration What was the duration of the interviews or focus group?

**Variable. From 45 minutes to 90 minutes.**

22. Data saturation Was data saturation discussed?

**Yes.**

23. Transcripts returned for comment and/or correction? Were transcripts returned to participants

**Yes.**

**Domain 3:  
analysis and  
findings**

Data analysis

24. Number of data coders How many data coders coded the data?

**Three.**

25. Description of the coding tree Did authors provide a description of the coding tree?

**Yes, see appendix 1.**

26. Derivation of themes derived from the data? Were themes identified in advance or derived from the data?

**Derived from the data.**

27. Software manage the data? What software, if applicable, was used to manage the data?

**Nvivo 10.**

28. Participant checking Did participants provide feedback on the findings?

**They were invited to but did not respond to requests.**

1  
2  
3 No Item Guide questions/description  
4  
5 Reporting Were participant quotations presented to  
6 illustrate the themes / findings?  
7

8 **Yes.**  
9

10  
11 29. Quotations presented Was each quotation identified? E.g.  
12 *participant number*  
13

14 **They were not identified in order to preserve**  
15 **confidentiality so no one person's story**  
16 **could be put together and identified.**  
17

18  
19 30. Data and findings consistent Was there consistency between the data  
20 presented and the findings?  
21

22 **Yes.**  
23

24 31. Clarity of major themes Were major themes clearly presented in  
25 the  
26 findings?  
27

28 **Yes.**  
29

30  
31 32. Clarity of minor themes Is there a description of diverse cases or  
32 discussion of minor themes?  
33

34 **Yes.**  
35  
36  
37  
38  
39  
40  
41  
42  
43  
44  
45  
46  
47  
48  
49  
50  
51  
52  
53  
54  
55  
56  
57  
58  
59  
60



**Delivering Dementia Care Differently. Evaluating the differences and similarities between a specialist medical and mental health unit and standard acute care wards: A qualitative study of family carers' perceptions of quality of care.**

|                                 |                                                                                                                                                                                                                                                                                                                                                                                                                                                         |
|---------------------------------|---------------------------------------------------------------------------------------------------------------------------------------------------------------------------------------------------------------------------------------------------------------------------------------------------------------------------------------------------------------------------------------------------------------------------------------------------------|
| Journal:                        | <i>BMJ Open</i>                                                                                                                                                                                                                                                                                                                                                                                                                                         |
| Manuscript ID:                  | bmjopen-2013-004198.R1                                                                                                                                                                                                                                                                                                                                                                                                                                  |
| Article Type:                   | Research                                                                                                                                                                                                                                                                                                                                                                                                                                                |
| Date Submitted by the Author:   | 18-Nov-2013                                                                                                                                                                                                                                                                                                                                                                                                                                             |
| Complete List of Authors:       | Spencer, Karen; University of Manchester,<br>Foster, Pippa; University of Nottingham, Division of Rehabilitation and Ageing, University of Nottingham<br>Whittamore, Kathy; University of Nottingham, Stroke, division of clinical neuroscience<br>Goldberg, Sarah; University of Nottingham, Division of Rehabilitation and Ageing, University of Nottingham<br>Harwood, Rowan; Health Care of Older People, Nottingham University Hospitals NHS Trust |
| <b>Primary Subject Heading</b>: | Health services research                                                                                                                                                                                                                                                                                                                                                                                                                                |
| Secondary Subject Heading:      | Qualitative research, Health services research, Geriatric medicine                                                                                                                                                                                                                                                                                                                                                                                      |
| Keywords:                       | Dementia < NEUROLOGY, Delirium & cognitive disorders < PSYCHIATRY, QUALITATIVE RESEARCH, Quality in health care < HEALTH SERVICES ADMINISTRATION & MANAGEMENT                                                                                                                                                                                                                                                                                           |
|                                 |                                                                                                                                                                                                                                                                                                                                                                                                                                                         |

SCHOLARONE™  
Manuscripts

1  
2  
3 **Delivering Dementia Care Differently. Evaluating the differences and similarities**  
4 **between a specialist medical and mental health unit and standard acute care wards: A**  
5 **qualitative study of family carers' perceptions of quality of care.**  
6  
7  
8

9  
10 Karen Spencer <sup>1</sup>, Pippa Foster <sup>1</sup>, Kathy H. Whittamore <sup>2</sup>, Sarah E. Goldberg <sup>1</sup>, Rowan H.  
11 Harwood <sup>1-2</sup>.  
12

13  
14  
15 <sup>1</sup> Division of Rehabilitation and Ageing, University of Nottingham. NG7 2UH. UK.  
16

17  
18 <sup>2</sup> Health Care of Older People, Nottingham University Hospitals NHS Trust, Queen's  
19 Medical Centre, Nottingham. NG7 2UH. UK.  
20  
21  
22

23  
24  
25  
26  
27 Correspondence to:  
28

29  
30 Professor Rowan Harwood  
31

32  
33 Health Care of Older People, Nottingham University Hospitals NHS Trust, Queen's Medical  
34 Centre, Nottingham. NG7 2UH.  
35  
36

37  
38 Tel: +44 115 924 9924 ext 61412/62511 Fax: +44 115 970 9947  
39

40  
41 Email: [rowan.harwood@nuh.nhs.uk](mailto:rowan.harwood@nuh.nhs.uk)  
42

43  
44 Word Count: 4,808  
45  
46  
47  
48  
49  
50  
51  
52  
53  
54  
55  
56  
57  
58  
59  
60



1  
2  
3 **Delivering Dementia Care Differently. Evaluating the differences and similarities**  
4 **between a specialist medical and mental health unit and standard acute care wards: A**  
5 **qualitative study of family carers' perceptions of quality of care.**  
6  
7  
8  
9

10 **ABSTRACT**

11  
12  
13 **Objectives:** To examine in depth carers' views and experiences of the delivery of patient care  
14 for people with dementia or delirium in an acute general hospital, in order to evaluate a  
15 specialist Medical and Mental Health Unit (MMHU) compared with standard hospital wards.  
16 This qualitative study complemented the quantitative findings of a randomised controlled  
17 trial.  
18  
19  
20  
21  
22  
23

24  
25 **Design:** Qualitative semi-structured interviews were conducted with carers of patients with  
26 cognitive impairment admitted to hospital over a four month period.  
27  
28  
29

30 **Setting:** A specialist MMHU was developed in an English National Health Service acute  
31 hospital aiming to deliver best-practice care. Specialist mental health staff were integrated  
32 with the ward team. All staff received enhanced training in dementia, delirium and person-  
33 centred care. A programme of purposeful therapeutic and leisure activities was introduced.  
34 The ward environment was optimised to improve patient orientation and independence. A  
35 proactive and inclusive approach to family carers was encouraged.  
36  
37  
38  
39  
40  
41  
42  
43

44 **Participants:** Forty carers' who had been recruited into a randomised controlled trial  
45 comparing the MMHU with standard wards.  
46  
47  
48

49  
50 **Results:** The main themes identified related closely to family carers' met or unmet  
51 expectations and included: activities and boredom; staff knowledge; dignity and fundamental  
52 care; the ward environment; and communication between staff and carers. Carers from  
53 MMHU were aware of, and appreciated, improvements relating to activities, the ward  
54  
55  
56  
57  
58  
59  
60

1  
2  
3 environment and staff knowledge and skill in the appropriate management of dementia and  
4  
5 delirium. However, communication and engagement of family carers was still perceived as  
6  
7 insufficient.  
8  
9

10 **Conclusion:** Our data demonstrates the extent to which the MMHU succeeded in its goal of  
11  
12 providing best practice care and improving carer experience, and where deficiencies  
13  
14 remained. Neither setting was perceived as wholly good or wholly bad, however greater  
15  
16 satisfaction (and less dissatisfaction) with care was experienced by carers' from MMHU  
17  
18 compared with standard care wards.  
19  
20  
21  
22  
23  
24  
25  
26  
27  
28  
29  
30  
31  
32  
33  
34  
35  
36  
37  
38  
39  
40  
41  
42  
43  
44  
45  
46  
47  
48  
49  
50  
51  
52  
53  
54  
55  
56  
57  
58  
59  
60

## ARTICLE SUMMARY

### Article focus

- One in three acute hospital admissions is of a confused older person and in recent years various reports have called for improvements in care for people with dementia and delirium admitted to hospital.
- We interviewed family carers of people with dementia or delirium in an acute general hospital to examine in depth their views and experiences of the delivery of patient care, in order to evaluate a specialist Medical and Mental Health Unit (MMHU) compared with standard hospital wards.

### Key messages

- Family carers identified and appreciated various aspects of care that were introduced as part of a service innovation that aimed to deliver best practice care for acutely ill people with delirium and dementia, including an improved environment, level of patient activity, and staff knowledge and skills, compared with experiences reported from standard care wards. However, communication with staff, especially nurses, and engagement with family carers was still considered unsatisfactory.
- New approaches to communication and engagement with family carers are required, including the assessment of expectations and the giving and receiving of information. Meeting this need will require changes to the way acute wards operate, and the re-prioritisation of staff time to enable this activity.

### Strengths and limitations of this study

- This study was undertaken alongside a randomised controlled trial, so patients and carers were to an extent matched for social and clinical characteristics. Wide-ranging semi-structured interviews permitted exploration of experiences, and uncovered areas of concern that might not have been anticipated in advance.
- Data are limited by coming from a single hospital. Studying the experience of patients with cognitive impairment is difficult because of memory, language and other cognitive problems. Family carers represent a suitable proxy, but have a partial view of the care delivered to a patient.
- Interviews were done some weeks after hospitalisation, which might influence perceptions and interpretations, and which aspects of the story were related to the interviewer. Family carers were sometimes interviewed with the patient participant present, which might limit what was said openly. Analysis of qualitative data is open to different interpretations and the possibility of preconception.

1  
2  
3 **Delivering Dementia Care Differently. Evaluating the differences and similarities**  
4 **between a specialist medical and mental health unit and standard acute care wards: A**  
5 **qualitative study of family carers' perceptions of quality of care.**  
6  
7  
8  
9

10 **Introduction**  
11

12  
13 The prevalence of dementia is increasing worldwide.<sup>1</sup> One in three acute hospital admissions  
14 is of a confused older person.<sup>2</sup> In recent years various reports have called for improvements  
15 in care for people with dementia admitted to hospital.<sup>3-7</sup> The Alzheimer's Society<sup>8</sup> identified  
16 key areas of dissatisfaction for carers relating to: a lack of person-centred care (PCC); nurses  
17 not recognising or understanding dementia; a lack of dignity and respect; patients not being  
18 helped to eat and drink; a lack of opportunity for social interaction and not enough carer  
19 collaboration in decision-making. Qualitative research exploring carers' perceptions of acute  
20 hospital care for people with dementia suggest that their experiences are variable. One study  
21 concluded that perceptions of poor care were linked to expectations and relationships with  
22 staff<sup>9</sup> Staff report lacking skills and confidence in caring for confused older people.<sup>8,10</sup>  
23  
24 Little previous research has evaluated attempts to improve the quality of care for confused  
25 older people in acute hospitals.  
26  
27  
28  
29  
30  
31  
32  
33  
34  
35  
36  
37  
38  
39

40  
41 A specialist Medical and Mental Health Unit (MMHU) was developed on an acute geriatric  
42 medical ward aiming to provide best practice care for patients with delirium and dementia  
43 following admission to a general hospital for acute medical care<sup>11</sup>. The intervention ward  
44 enhanced five aspects of care. Additional specialist staff were employed (mental health  
45 nurses, and mental health specialist occupational, physiotherapist and speech and language  
46 therapists, and a psychiatrist) alongside acute hospital staff. Staff received enhanced training  
47 in dementia, delirium and PCC following the Bradford Dementia Group approach<sup>12-13</sup> using  
48 a combination of didactic and ward-based learning, including co-working with the mental  
49  
50  
51  
52  
53  
54  
55  
56  
57  
58  
59  
60

1  
2  
3 health specialist staff. A programme of purposeful activities matched to retained abilities was  
4 introduced (such as dominoes, quizzes, crafts, ball games, music and reminiscence, getting  
5 dressed and social eating).<sup>14</sup> The ward environment was optimised with the aim of improving  
6 patient orientation and independence. A proactive and inclusive approach to family carers  
7 was encouraged, with more communication, liberal visiting times and the invitation to engage  
8 in day to day care. Patient personal profile documentation was developed to be completed by  
9 family carers. A series of information leaflets were designed and made available to carers.

10  
11  
12  
13  
14  
15  
16  
17  
18  
19 The MMHU was evaluated in a controlled trial that randomised 600 confused patients over  
20 age 65 who had been admitted for emergency medical care to the unit or standard care.<sup>15-16</sup>  
21  
22  
23 Standard care wards comprised 70% acute geriatric medical and 30% general medical wards.  
24  
25  
26 This study suggested improved patient experience and family carer satisfaction, but no  
27 differences in health status outcomes. This qualitative study contributes to the evaluation by  
28 exploring carers' accounts of their experiences of hospital care, which is both an outcome in  
29 itself, and a check on the 'fidelity' of the intervention.  
30  
31  
32  
33  
34

## 35 **Methods**

### 36 *Sampling and Data Collection*

37  
38  
39  
40  
41 Recruitment to the qualitative study took place over the final four months of the trial. During  
42 this time family carers of patients recruited into the trial were asked if they would also consent to  
43 taking part in an interview study. If they agreed, participants were approached by the qualitative  
44 researcher, depending only on researcher availability for interviews, until 20 were recruited  
45 from each setting. All those approached agreed to take part. Recruitment had to be completed  
46 whilst the trial was on-going, and we chose 20 per group as likely to be sufficient to achieve  
47 saturation, although full analysis of data was only completed after recruitment ceased. Carers  
48 gave written consent, and took part in a face-to-face semi-structured interview. An interview  
49  
50  
51  
52  
53  
54  
55  
56  
57  
58  
59  
60

1  
2  
3 guide was developed and checked in a pilot interview. Initially topics were selected from the  
4 literature, and subsequent topics were added if they arose during interviews. Topics included:  
5 patient admission and settling in to the ward; carer relationship with staff; the ward  
6 environment; patients' daily routines such as sleeping, meals, hygiene and activities; privacy  
7 and dignity; care and medical treatment; discharge planning. Participants were encouraged to  
8 discuss both what they considered worked well and not so well. A series of prompts was  
9 devised to encourage participants to elaborate in more detail when asked a general question.  
10 Interviews were conducted in the carer's home and consent was obtained to audio record  
11 interviews. Participants were reassured that privacy, confidentiality and identity would be  
12 protected. The interviewer was an experienced medical sociologist, not involved in delivering  
13 clinical care. Approval was received from a research ethics committee and hospital research  
14 governance department.

### 30 *Data Analysis*

31  
32 Interviews were transcribed verbatim, and Nvivo 10 software was used to facilitate analysis.  
33 Data were analysed thematically using a framework analysis that allowed a systematic  
34 process to be followed in the development of knowledge and theory.<sup>17</sup> Framework analysis is  
35 a flexible approach utilised in health service research that allows all data to be collected and  
36 then analysed.<sup>18</sup> The organisation of data within this approach involved a five stage process:  
37 1) familiarization; 2) identifying a thematic framework; 3) indexing; 4) charting; and 5)  
38 mapping and interpretation.<sup>17</sup> Familiarization with data involved constant comparison across  
39 data to identify categories and themes. Coding transcripts to identify recurrent statements and  
40 expressed feelings formed the basis of the thematic framework (see, appendix 1). Themes  
41 were compared and contrasted between settings via indexing, charting and mapping to  
42 provide a detailed understanding and interpretation of participants' experiences, and if and  
43 how the intervention added to carers' perspectives of quality of care. All authors met on a  
44  
45  
46  
47  
48  
49  
50  
51  
52  
53  
54  
55  
56  
57  
58  
59  
60

1  
2  
3 regular basis to discuss the development of codes, themes, categories and theories about the  
4  
5 phenomenon being studied.  
6  
7

## 8 **Results**

### 9 *Participants*

10  
11  
12  
13  
14 20 carers were interviewed from the MMHU, whose relationship to patients was: two  
15  
16 spouses, thirteen daughters, two sons, one brother and two granddaughters. The 20 carers  
17  
18 from standard care were: six spouses, six daughters, one granddaughter, five sons, one sister  
19  
20 and one nephew. The patients were seven males and thirteen females from MMHU, mean age  
21  
22 87 (range 83-97), and eleven males and nine females from standard care, mean age 85 (range  
23  
24 69-95).  
25  
26

### 27 *Findings*

28  
29  
30  
31 Data saturation of key themes was achieved by interview fifteen (MMHU) and interview  
32  
33 eighteen (standard care). The themes identified as being important in exploring differences  
34  
35 and similarities between participants' experiences of quality of care in the two groups were:  
36  
37

- 38 (1) Activities and boredom;
- 39
- 40 (2) Staff knowledge;
- 41
- 42 (3) Dementia, dignity and fundamental care;
- 43
- 44 (4) Ward environment;
- 45
- 46 (5) Communication between carers and staff;
- 47
- 48 (6) Carer expectations.
- 49
- 50
- 51
- 52
- 53
- 54
- 55
- 56
- 57
- 58
- 59
- 60



1  
2  
3 *Activities and boredom*  
4

5  
6 Carers from both groups commented on activities offered and whether they perceived that  
7  
8 patients experienced boredom. Relatives from MMHU made more references to patients  
9  
10 being engaged in activities compared with standard care; half of these relatives were aware,  
11  
12 or appreciative, of patient involvement in activities on the ward:  
13

14  
15  
16 ‘The activity co-ordinator put on some old tunes in the day room, like Frank Sinatra  
17  
18 everyone was having a bit of a giggle actually, because she loves music and that stuff,  
19  
20 so that’s good’ (Daughter of 84 year old, female, MMHU patient).  
21  
22

23 Six carers highlighted that patients were too ill to have engaged with activities, or would not  
24  
25 have wanted to be involved in these:  
26  
27

28  
29 ‘We did see the activity room, and I think, possibly, if he’d been well enough to just  
30  
31 sit in there whilst things were going on, he would have enjoyed that’ (Daughter of 95  
32  
33 year old, male, MMHU patient).  
34  
35

36 Four MMHU carers stated that their relative would not have had any lasting memory of  
37  
38 activities, and this meant family members would not have been aware what activities their  
39  
40 relative had been involved with. Others were aware that patients had taken part, and felt that  
41  
42 even if they had no recollection of this, patients had nevertheless enjoyed the activities at the  
43  
44 time, which carers considered positive:  
45  
46

47  
48 ‘We went in and she was having her hair done, that person [activity coordinator] said  
49  
50 that mum had won the film quiz the night before, and mum couldn’t even remember  
51  
52 doing it. What a shame that whenever we ask her, she can’t remember having done  
53  
54 anything’ (Daughter of 87 year old, female, MMHU patient).  
55  
56  
57  
58  
59  
60

1  
2  
3 Five relatives from standard care commented that there was little stimulus for patients and  
4  
5 some considered that this left patients bored. Others felt that having activities could have  
6  
7 prevented behaviours such as wandering or vocalisation. Some standard care relatives  
8  
9 referred to the need for the kinds of activities that were being offered on MMHU. A few  
10  
11 relatives from MMHU were aware of activities, but felt dissatisfaction because their relative  
12  
13 had not had a chance to engage in them.  
14

### 15 16 17 *Staff knowledge* 18

19  
20 There were noticeable differences between the two groups relating to staff knowledge of  
21  
22 dementia and delivery of professional care. Carers of MMHU patients described staff as  
23  
24 being ‘well prepared’ for dealing with confused patients, displaying patience and  
25  
26 compassion. Respondents noted that patients who liked to wander were guided by staff  
27  
28 when walking up and down rather than constantly being returned to their bed space,  
29  
30 behaviour observed by carers on standard care wards. A few respondents praised the support  
31  
32 of mental health nurses on MMHU in defusing situations, although some family carers were  
33  
34 unaware that MMHU had special staffing:  
35  
36

37  
38 ‘One night Grandma was in quite a strop, she was having a tantrum and a nurse came  
39  
40 over, she didn’t have to and I thought it was nice that she came over and she was  
41  
42 trying to calm her. I thought she gave that little bit extra’. (Granddaughter of 91 year  
43  
44 old, female MMHU patient).  
45  
46  
47

48  
49 Standard care respondents felt that some staff displayed a negative attitude towards confused  
50  
51 patients. Participants felt that staff had little understanding and limited training in dementia  
52  
53 care which carers felt resulted in patients being ignored, shouted at or threatened when staff  
54  
55 were faced with uncooperative or challenging situations. In some cases this led to  
56  
57 confrontation between nurses and family carers who reacted to what they perceived as  
58  
59  
60

1  
2  
3 unacceptable staff attitudes towards patients. These carers further highlighted that they  
4  
5 hadn't formally complained for fear of repercussions towards their relative:  
6  
7

8 'She [health care assistant] kept shouting at him, turn over, turn over I can't get to  
9  
10 you. So eventually I opened the curtains and said that man's confused he can't  
11  
12 understand you. She [health care assistant] knew I was sitting outside the curtain and  
13  
14 it didn't deter her, she was really shouting'. (Wife of 69 year old, male, standard care  
15  
16 patient).  
17  
18  
19

20 Carers further described how they felt it necessary to offer individualised support and  
21  
22 guidance to health professionals in dealing with patients, as they considered staff to be  
23  
24 lacking in dementia expertise. Some participants felt they needed to provide one-to-one  
25  
26 personal care as they perceived staff were unable to fulfil this role due to their inexperience.  
27  
28 One carer from standard care commented that staff had inferred that the ward was a 'mixed  
29  
30 medical ward that was not equipped to deal with dementia patients' who were considered  
31  
32 time consuming, as staff would have to have 'extra patience with them'. Some carers  
33  
34 considered offering one-to-one care as an extension of their 'main carer' role which  
35  
36 transferred with them from home to hospital:  
37  
38  
39

40 'If he was on a ward where they understood him better and would be able to wash and  
41  
42 dress him without me having to go up there, it would have been different'. (Daughter  
43  
44 of 83 year old, male, standard care patient).  
45  
46  
47

#### 48 *Dementia, dignity and fundamental care* 49

50  
51 For many family carers an important aspect of satisfaction involved fundamental elements of  
52  
53 personal care such as elimination, washing and dressing, eating and drinking. Participants  
54  
55 believed that such personal and intimate care should be delivered sensitively and that  
56  
57  
58  
59  
60

1  
2  
3 patient's dignity should be protected. MMHU carers (14) and standard care (10) participants  
4  
5 stated that they witnessed appropriate curtain use that ensured patients received privacy when  
6  
7 needed. Negative comments from four MMHU carers and ten standard care participants  
8  
9 considered that their loved ones had received less dignified care. Concerns from MMHU  
10  
11 participants ranged from patients dentures not being cleaned by staff, respondents feeling that  
12  
13 it was inappropriate for male nurses to attend the toileting needs of female patients and a  
14  
15 patient, being discharged 'in her night gown, unwashed and smelling'. Complaints raised by  
16  
17 standard care participants, related to patients being found by visitors with excrement under  
18  
19 their fingernails and used incontinence pads found by patients bed sides. Instances were  
20  
21 mentioned of patients undressing in public bays, toilet doors being left open exposing female  
22  
23 patients to passing male patients and visitors, a patient being found in wet bed sheets or not  
24  
25 washed. This was considered due to staff inexperience in delivering care to confused patients:  
26  
27  
28

29  
30 'I had to clean her nails because she had excrement all under her fingernails, the  
31  
32 nurse said she'd put her on a bed pan and then caught her getting off, trying to clear it  
33  
34 up'. (Son of 87 year old, female, standard care patient).  
35  
36

37  
38 One standard care patient who had recovered from delirium and who was present during an  
39  
40 interview with his family carer commented that he had been embarrassed and had not wanted  
41  
42 to eat to avoid emptying his bowls after a nurse had not cleaned him properly during a visit to  
43  
44 the toilet.  
45  
46

47  
48 Carers from both MMHU (11) and standard care wards (12) expressed satisfaction with the  
49  
50 hospital food, and positive comments related to the quality, menu choice and patients  
51  
52 enjoyment of meals. Participants from across the sample further highlighted that if frail older  
53  
54 patients displayed a poor appetite, hospital staff offered alternative snacks and sandwiches,  
55  
56 which carers appreciated. Five carers of patients on MMHU expressed concern about staff  
57  
58  
59  
60

1  
2  
3 not assisting patients with eating and drinking. Dissatisfaction expressed from ten standard  
4  
5 care participants mainly related to lack of understanding, help and encouragement with eating  
6  
7 and/or drinking for confused older patients:  
8  
9

10 ‘She [patient] wasn’t drinking sufficiently, they [staff] were giving her a cup of tea  
11  
12 but she couldn’t hold it, she’d spill it all down herself. And they [staff] weren’t doing  
13  
14 anything to help when it was mealtime, they [staff] put the meals out and they  
15  
16 [patients] seemed to be left to it’. (Son of 93 year old, female, standard care patient).  
17  
18  
19

20 A small number of carers from MMHU (2) and standard care (4) questioned whether  
21  
22 confused older patients were in a position to make menu choices about the food they usually  
23  
24 chose and enjoyed. Carers commented that staff had probably decided on behalf of patients  
25  
26 and would have appreciated more involvement.  
27  
28

### 29 *Ward Environment*

30  
31  
32 Carers from both MMHU and standard care generally described the wards as ‘clean and tidy’.  
33  
34 Less positive comments expressed by three carers of patients on standard care related to  
35  
36 décor or minor cleanliness issues. Comments made by relatives from MMHU suggested  
37  
38 carers were appreciative of some of the changes made to the ward environment that involved  
39  
40 improving the décor and personalising patients’ surroundings. Carers were also positive  
41  
42 about the day and activities room but very few were aware of the private sensory room.  
43  
44 Some carers also considered the availability of information leaflets to be a helpful  
45  
46 educational resource:  
47  
48  
49

50  
51 ‘There’s more pictures, and that’s nice and there’s an activities board which is quite  
52  
53 nice as well and there’s a bit more colour. They’ve [patients] all have theses memory  
54  
55  
56  
57  
58  
59  
60

1  
2  
3 boxes behind the bed. Mum hasn't got anything in there yet, but I've got photos that I  
4  
5 could put in there. (Daughter of 84 year old, female, MMHU patient).  
6  
7

8 *Communication between carers and staff*  
9

10  
11 Relatives of patients on both MMHU and standard care wards had positive and negative  
12 experiences of communication and engagement with ward staff, but in general wanted more  
13 regular communication. Carers' perceptions of their relationship with staff closely  
14 corresponded with their met or unmet expectations, which were influenced by the level of  
15 cognitive impairment and communication difficulties experienced by patients. A similar  
16 number of carers of both MMHU (12) and standard care patients (11) described positive  
17 experiences, including certain staff being informative, helpful, friendly or approachable.  
18 These positive experiences influenced their perceptions of quality of care. However,  
19 experiences with different staff members could vary greatly.  
20  
21  
22  
23  
24  
25  
26  
27  
28  
29  
30  
31

32 'We saw [the consultant], who was excellent, he was informative, he was helpful, he  
33 was sympathetic', but there was one nurse that came across as abrasive and therefore  
34 you're a bit wary about asking too many questions, but the auxiliary nurse was  
35 lovely.... (Son of 87 year old, female, standard care patient).  
36  
37  
38  
39  
40  
41

42 Family members who described poor relationships or ineffective communication with staff  
43 indicated greater dissatisfaction with the quality of care they experienced. The main  
44 grievance cited by carers concerned the lack of being kept informed, which led some to feel  
45 neglected and ignored. This point was particularly emphasised by carers who found it  
46 difficult or impossible to get information from the patient themselves:  
47  
48  
49  
50  
51  
52  
53  
54  
55  
56  
57  
58  
59  
60

1  
2  
3 'I mean, if people like my dad are in here because of their age and memory loss  
4 really, they [staff] should be talking to the family, shouldn't they? Or somebody  
5 should'. (Daughter of 87 year old male, MMHU patient).  
6  
7  
8  
9

10 Some family members believed that staff should voluntarily provide information on patient's  
11 care and progress rather than families feeling obligated to initiate interactions. Carers who  
12 were reluctant to approach staff described feeling anxious about being left uninformed:  
13  
14  
15

16  
17  
18 'I did have to ask to find out what was going on, and I know the ward was busy and  
19 you don't want to interfere with people when they're working sort of, but it's kind of,  
20 when you're feeling that anxious, you just want that little bit more reassurance that,  
21 yes, somebody will come and speak to you'. (Granddaughter of 85 year old, male,  
22 MMHU patient).  
23  
24  
25  
26  
27  
28

29 Lack of communication and information sharing between staff and family carers was also  
30 evident at discharge on both MMHU (9) and standard care (10). Approximately half of the  
31 carers described the discharge experience in a number of negative ways including: delayed,  
32 rushed, and undignified. Carers did appreciate that problems were often beyond the control  
33 of ward staff themselves and related to organisational barriers:  
34  
35  
36  
37  
38  
39

40  
41 'Discharge was a bit belated. Largely because she had to stay there [in hospital] until  
42 the aftercare package with the intermediate care team could be set up to come and  
43 supervise her at home'. (Husband of 75 year old female, MMHU patient).  
44  
45  
46  
47  
48

49 In discussions with carers about whether staff had engaged with them about patients'  
50 backgrounds and interests, both positive and negative comments were noted from  
51 respondents. Half of MMHU carers (10) commented that they had been approached by staff  
52 to complete personal profile documentation about patients' past lives. Many considered that  
53  
54  
55  
56  
57  
58  
59  
60

1  
2  
3 they were a good idea although a couple of family members mentioned that they had  
4  
5 completed them later than expected, and one respondent speculated whether staff referred to  
6  
7 them or not:  
8  
9

10 'I filled one form in I answered, you know, her interests, what she enjoyed doing, I do  
11  
12 think it's a good idea. The girl [nurse] that gave me the form said it was, to help them  
13  
14 understand the person, to get to know the lady in the bed'. (Daughter of 87 year old,  
15  
16 female, MMHU patient).  
17  
18  
19

20 Staff on standard care wards did not routinely complete personal profile documentation with  
21  
22 family carers, but respondents were asked if they felt staff had got to know any background  
23  
24 information about patients. Most (15) family carers from standard care commented that staff  
25  
26 had not enquired about patients' personal lives other than past medical history (compared  
27  
28 with four MMHU participants). A few participants considered that it would be difficult for  
29  
30 nurses to get to know patients due to the short length of stay in an acute setting and lack of  
31  
32 continuity in care due to shift length and patterns. Some family carers felt that nurses were  
33  
34 too busy to have much interaction with patients and that conversation would focus around  
35  
36 general tasks such as giving injections, changing drips and other medical treatments:  
37  
38  
39

40  
41 'They [nurses] had conversations with me...what she'd been up to, but not much  
42  
43 conversation about her past or anything like that'. (Granddaughter of 98 year old,  
44  
45 female, standard care patient).  
46  
47

#### 48 *Carer Expectations*

49

50  
51 Relatives' expectations of the quality of care they presumed patients would receive on the  
52  
53 ward (formed prior to patient admission) compared with actual experiences (determined by  
54  
55 perceptions formed during and after discharge) influenced their satisfaction with the ward.  
56  
57  
58  
59  
60



1  
2  
3 The five themes identified in this analysis (activities, staff knowledge, fundamental care,  
4 ward environment and communication between staff and carers) all related to expectations,  
5 which formed a cross-cutting theme. In order to examine unmet expectations, participants  
6 were asked to make suggestions about what future improvements could be made to the ward.  
7 Several family carers MMHU (6) and standard care (7) highlighted aspects of communication  
8 and collaboration between staff and carers:  
9  
10  
11  
12  
13  
14  
15  
16

17 'I would like it if they [staff] came and introduced themselves. So if they haven't seen  
18 you before, then you're sat by your mother's bed, they should come over and say,  
19 well, I'm the ward sister, or I'm the daily nurse who's looking after her, you know,  
20 sorting her washing [needs] and things like that'. (Son of 93 year old, female,  
21 MMHU patient).  
22  
23  
24  
25  
26  
27  
28

29 Further suggestions included: more patient stimulation, carers being present during ward  
30 rounds, longer visiting hours, having a named nurse, receiving a daily briefing from staff, a  
31 daily diary or check lists for carers, and separate bays for more vocal patients. Family carers  
32 from MMHU and standard care wards had a variety of unique expectations that closely  
33 related to their satisfaction or dissatisfaction with care:  
34  
35  
36  
37  
38  
39  
40

41 'I think it's a lot better for the patient if there's continuity with the same person,  
42 because then you do get to know that patient a lot, a lot better. But it probably won't  
43 work in a hospital situation where I know it's not going to be a one to one situation. It  
44 never will be, because the NHS can't afford it'. (Son of 89 year old, male, standard  
45 care patient).  
46  
47  
48  
49  
50  
51

52 'I thought he would have been better with mental nurse looking after him. To  
53 understand him better, understand his needs, do you know what I mean? Rather than  
54 them saying to me, Well, we've tried to talk to your dad this morning and he's just not  
55  
56  
57  
58  
59  
60

1  
2  
3 having none of it, he's a bit confused....No, he's not confused, he's got dementia,  
4  
5 he's ill. You know, he's got vascular dementia'. (Daughter of 84 year old, male,  
6  
7 standard care patient).  
8  
9

## 10 Discussion

11  
12 This qualitative study evaluated an intervention which aimed to improve care for patients  
13 with dementia and delirium admitted to an acute hospital. The main themes identified in  
14 exploring carer satisfaction related closely to their met or unmet expectations and included:  
15 activities and boredom; staff knowledge; dignity and fundamental care; the ward  
16 environment; and communication between staff and carers. Neither setting was perceived as  
17 wholly good or wholly bad, however greater satisfaction (and less dissatisfaction) with care  
18 was experienced by carers' from MMHU compared with standard care wards. Meeting  
19 carers' expectations is an important factor leading to greater satisfaction with patient care.<sup>19</sup>  
20 Clearly developing awareness of carers' expectations/unmet expectations should enable  
21 nursing staff to understand the carers' perspective and improve communication as well as  
22 satisfaction. Carers were aware of improvements relating to activities, the ward environment  
23 and staff knowledge and awareness of the appropriate management of dementia and delirium.  
24 However, in some cases communication and engagement of family carers was still perceived  
25 as insufficient.  
26  
27  
28  
29  
30  
31  
32  
33  
34  
35  
36  
37  
38  
39  
40  
41  
42  
43  
44

45 The MMHU development was an ambitious attempt to overcome previously identified  
46 problems with acute hospital care by acknowledging and attempting to address, a lack of  
47 knowledge and skills, a bland and disorientating environment, a lack of therapeutic and  
48 diversionary activity and better communication and engagement with family carers.<sup>11</sup> The  
49 underlying philosophy was that of PCC, which has been advocated over the past decade in  
50 order to enhance well-being for people with dementia and to avoid distress and associated  
51  
52  
53  
54  
55  
56  
57  
58  
59  
60

1  
2  
3 disturbed behaviours. PPC aims to support emotional and psychological needs by valuing  
4  
5 people with dementia and treating them as individuals, by looking at the world from the  
6  
7 perspective of the person with dementia and by creating a positive social environment.<sup>20, 13</sup>

8  
9  
10 There are various descriptions of PCC and no consensus on its definition or how to apply it  
11  
12 during acute illness.<sup>21-22</sup> Biographical information can be used to promote knowledge of the  
13  
14 person with dementia such as family, occupation, hobbies, likes and dislikes and can help  
15  
16 staff focus on the person as an individual.<sup>23</sup> Personalising dementia patients' surroundings  
17  
18 has been associated with positive effects on behaviour and mood as well as improved  
19  
20 orientation.<sup>24-25,4</sup> Meaningful activity such as reminiscence, games and crafts can foster  
21  
22 social interaction between staff and patients<sup>20,26-27</sup> whilst dressing and social eating provide a  
23  
24 sense of purpose and dignity, and maintains necessary basic daily skills. However, hospitals  
25  
26 are busy, fast-moving and noisy, making them difficult places for people with dementia.<sup>7</sup>  
27  
28 Patients are often ill and dependent<sup>2, 28</sup> and physical medical care is necessarily prioritised.  
29  
30 The necessary medical monitoring and nursing interventions can be misunderstood or seen as  
31  
32 threatening. Length of stay is typically short. These factors limit the scope for delivering PCC  
33  
34 and family engagement.<sup>29</sup>

35  
36  
37  
38  
39 The central role of family carers as stakeholders in the care of people with dementia has been  
40  
41 emphasised many times.<sup>30-32</sup> Carers' experiences of the wards were mediated by many  
42  
43 factors related to the severity of the patients' illness, duration of stay, past experience of  
44  
45 hospitalisation, the length of time spent visiting the ward, their expectations of the care the  
46  
47 ward could provide, competing commitments and carer strain.<sup>33</sup> Family carers wanted an  
48  
49 even greater level of communication and engagement than was achieved on MMHU, despite  
50  
51 this being an explicit goal on the unit (a finding also reported by Li *et al*<sup>34</sup>). Carers were  
52  
53 appreciative when involved in aspects of their relative's care but disillusioned when they felt  
54  
55 excluded or neglected. Relationships between staff (especially nurses) and relatives still need  
56  
57  
58  
59  
60

1  
2  
3 reforming with more partnership and collaboration. Few previous studies have reported  
4 attempts at improvement, and rigorous evaluation is difficult in this field.<sup>35-36</sup> Collaboration,  
5 in terms of shared decision-making and exchange of knowledge and information has been  
6 shown to be particularly important for relatives' satisfaction with hospital care of older  
7 people.<sup>37</sup> Organisational factors have also been identified as impeding the development of  
8 effective nurse-family collaboration include; a task focused culture and workload; the  
9 organisations' focus on risk; shift patterns and length; a lack of training; poor supervision;  
10 resistance to change and bureaucratic issues.<sup>38,10</sup>

### 21 **Strengths and limitations**

22  
23  
24 This study was undertaken alongside a randomised controlled trial, so patients and carers  
25 were to an extent matched for social and clinical characteristics, and illness severity. Wide-  
26 ranging semi-structured interviews permitted exploration experiences in depth, and  
27 uncovered areas of concern for participants that might not have been anticipated in advance.  
28 The data are limited by coming from a single English National Health Service hospital, but  
29 the hospital provided sole emergency medical services for its local population, and is likely to  
30 be representative. Studying the experience of patients with cognitive impairment is difficult  
31 because of memory and language problems, and difficulties perceiving time and abstract  
32 concepts. Family carers are often assumed to be a suitable proxy, but have a very partial view  
33 of the care delivered to a patient. Indeed, they are often aware of this limitation, and it can be  
34 a source of anxiety to them. Interviews were done some weeks after hospitalisation, which  
35 might influence perceptions and interpretations of experiences, and which aspects of the story  
36 were related to the interviewer. Family carers were sometimes interviewed with the patient  
37 participant present, which might limit what was said openly. Analysis of qualitative data is  
38 open to different interpretations and the possibility of preconception.

## Conclusion

Critical reports focusing on dignity and nutrition standards for older patients have prompted an additional focus on patient and carer satisfaction as well as clinical outcomes and safety.<sup>39</sup>

Our findings support recent initiatives to improve care in hospitals.<sup>40</sup> Dementia 2012: A national challenge calls for improvements in the general hospital care of people with dementia including a better prepared workforce.<sup>41</sup> The enhancements of care on the MMHU that included enhanced training in dementia, delirium and PCC helped staff deliver dementia care differently and more appropriately and this study provides evidence of its effectiveness.

However, the amount of communication required by family carers cannot be underestimated.

We found the extent of this surprising and beyond what we had planned for. New approaches to engagement with family carers are required, including the assessment of expectations and the giving and receiving of information. Meeting this need will require major changes to the way acute wards operate, and the re-prioritisation of staff time to enable this activity.

Facilitating more hands-on care by family members may provide the *quid pro quo* to enable it within resource-constrained healthcare systems. Organisational development methodologies should be explored in future attempts to implement such changes, alongside more staff-directed education and training interventions, and incorporation in pre-registration education.

Nurse leaders will play an important role in creating conditions and fostering a culture that enables and rewards the delivery of 'relationship-centred' care for this population.<sup>31</sup>

ACKNOWLEDGEMENTS AND DISCLAIMER: This paper presents independent research funded by the National Institute for Health Research (NIHR) under its Programme Grants for Applied Research funding scheme (RP-PG-0407-10147). The views expressed are those of the authors and not necessarily those of the National Health Service, the NIHR or the Department of Health. The

1  
2  
3 funders and study sponsors had no role in study design, collection, analysis and interpretation of data;  
4  
5 writing the manuscript; or the decision to submit for publication. The Medical Crises in Older People  
6  
7 study group also included Justine Schneider, Simon Conroy, Anthony Avery, Judi Edmans, Adam  
8  
9 Gordon, Bella Robbins, Jane Dyas, Pip Logan, Rachel Elliott, Matt Franklin.

10  
11  
12 CONFLICT OF INTEREST: None.

13  
14  
15 ETHICAL APPROVAL: The study was approved by the Nottingham research ethics committee.

16  
17  
18 CONTRIBUTORS. RH and KS conceived the study. SG, PF and KW managed the trial and  
19  
20 recruited the participants. KS undertook the interviews, and coded the data. All authors  
21  
22 discussed the coding, and interpretation. KS drafted the manuscript, which was revised by  
23  
24 RH, and approved by all authors. KS is guarantor.

25  
26  
27 DATA SHARING: No additional data available.  
28  
29  
30  
31  
32  
33  
34  
35  
36  
37  
38  
39  
40  
41  
42  
43  
44  
45  
46  
47  
48  
49  
50  
51  
52  
53  
54  
55  
56  
57  
58  
59  
60

## References

1. World Health Organization (WHO). Dementia: a public health priority. 2012.  
[http://www.apps.who.int/iris/bitstream/10665/75263/1/9789241564458\\_eng.pdf](http://www.apps.who.int/iris/bitstream/10665/75263/1/9789241564458_eng.pdf).
2. Goldberg, S.E., Whittamore, K., Harwood, R.H., et al. The prevalence of mental health problems amongst older adults admitted as an emergency to a general hospital. *Age and Ageing*, 2012; 41, 80-86, doi: 10.1093/ageing/afr106.
3. Royal College of Psychiatrists. Who cares wins: Improving the outcomes for older people admitted to the general hospital: Guidelines for the development of Liaison Mental Health Services for older people. London 2005.  
<http://www.rcpsych.ac.uk/pdf/whocareswins.pdf>.
4. Royal College of Psychiatrists. Report of the National Audit of Dementia Care in General Hospital. Editors: Young, J., Hood, C., Woolley, R., Gandesha, A. & Souza, R. London: Healthcare Quality Improvement Partnership. 2011.  
<http://www.rcpsych.ac.uk/pdf/NATIONAL%20REPORT%20-%20Full%20Report%201201122.pdf>.
5. Department of Health. Living Well With Dementia: A National Dementia Strategy: A National Dementia Strategy. Department of Health. London. 2009.  
<https://www.gov.uk/government/publications/living-well-with-dementia-a-national-dementia-strategy>.
6. Department of Health. Quality outcomes for people with dementia: Building on the work of the national dementia strategy. Department of Health. London. 2010.  
<https://www.gov.uk/government/publications/quality-outcomes-for-people-with-dementia-building-on-the-work-of-the-national-dementia-strategy>.

- 1  
2  
3 7. Royal College of Nursing. Improving quality of care for people with dementia in  
4  
5 general hospitals. RCN, London. 2010.  
6  
7 <http://nursingstandard.rcnpublishing.co.uk/shared/cms/file.asp?e=35&i=172190>.  
8  
9
- 10 8. Alzheimer's Society. Counting the cost: Caring for people with dementia in hospital  
11  
12 ward. Alzheimer's Society. London. 2009.  
13  
14 <http://www.alzheimers.org.uk/countingthecost>  
15
- 16 9. Jurgens, F., Clissett, P., Gladman, J.R.F., et al. Why are family carers of people with  
17  
18 dementia dissatisfied with general hospital care? A qualitative study. *BMC Geriatrics*.  
19  
20 2012; 12:57, 1-10; doi: 10.1186/1471-2318-12-57.  
21  
22
- 23 10. Gladman, J., Porock, D., Griffiths, A, et al. Care of Older people with Cognitive  
24  
25 Impairment in General Hospitals. Final report NIHR Service Delivery and  
26  
27 Organisation Programme. 2012. [http://www.netscc.ac.uk/hsdr/projdetails.php?ref=08-](http://www.netscc.ac.uk/hsdr/projdetails.php?ref=08-1809-227)  
28  
29 1809-227.  
30  
31
- 32 11. Harwood, R.H., Porock, D., King, N., et al. Development of a specialist medical and  
33  
34 mental health unit for older people in an acute general hospital. University of  
35  
36 Nottingham Medical Crises in Older People discussion paper series. 2010. Issue 5, 1-  
37  
38 46. ISSN 2044-4230. [http://nottingham.ac.uk/mcop/documents/papers/mcop-](http://nottingham.ac.uk/mcop/documents/papers/mcop-issn2044-4230-issue5.pdf)  
39  
40 issn2044-4230-issue5.pdf.  
41  
42
- 43 12. Kitwood T. Dementia Reconsidered: The person comes first. Open University Press,  
44  
45 Buckingham. 1997.  
46
- 47 13. Brooker, D. Person-centred dementia care. Jessica Kingsley Publishers, London &  
48  
49 Philadelphia . 2007.  
50  
51
- 52 14. Pool, J. The Pool Activity level (PAL) instrument for occupational profiling: a  
53  
54 practical resource for people with cognitive impairments: 3<sup>rd</sup> ed. Jessica King  
55  
56 Publishers, London. 2008.  
57  
58  
59  
60



- 1  
2  
3 15. Harwood, R.H., Goldberg, S.E., et al. Study protocol. 2011. Evaluation of a Medical  
4 and Mental Health Unit compared with standard care for older people whose  
5 emergency admission to an acute general hospital is complicated by concurrent  
6 'confusion': a controlled clinical trial. *Trials*, 12:123. 1-11. doi:10.1186/1745-6215-  
7 12-123. <http://www.trialsjournal.com/content/12/1/123>.  
8  
9  
10  
11  
12  
13  
14 16. Goldberg, S.E., Bradshaw, L.E., Kearney, F.C., et al. Care in a specialist Medical and  
15 Mental Health Unit compared with standard care for older people with cognitive  
16 impairment admitted to a general hospital: a randomised controlled trial (NIHR  
17 TEAM trial). *BMJ* 2013; 347 doi: <http://dx.doi.org/10.1136/bmj.f4132>.  
18  
19  
20  
21  
22  
23 17. Ritchie, J., Spencer, L. Qualitative data analysis for applied policy research. In  
24 'Analyzing Qualitative Data'. Edited by Bryman, A., Burgess, R.G. London:  
25 Routledge. 1994.  
26  
27  
28  
29  
30 18. Srivastava, A. & Thomson, S.B. Framework analysis: a qualitative methodology for  
31 applied policy research. *Journal of Administration & Governance*. 2009; 4,2, 72-79.  
32 [http://www.joaag.com/uploads/06\\_Research\\_Note\\_Srivastava\\_and\\_Thomson\\_4\\_2\\_.p](http://www.joaag.com/uploads/06_Research_Note_Srivastava_and_Thomson_4_2_.pdf)  
33 [df](http://www.joaag.com/uploads/06_Research_Note_Srivastava_and_Thomson_4_2_.pdf).  
34  
35  
36  
37  
38 19. Rozenblum, R., Lisby, M., Hockley, P.M., et al. Uncovering the blind spot of patient  
39 satisfaction: an international survey. *BMJ Qual Saf*, 2011; 20, 959-965.  
40 doi:10.1136/bmjqs-2011-000306.  
41  
42  
43  
44  
45 20. Brooker, D. What is person-centred care in dementia? *Reviews in Clinical*  
46 *Gerontology*, 2003; 13,3, 215-222.  
47 <http://journals.cambridge.org/action/displayAbstract?fromPage=online&aid=230595>.  
48  
49  
50  
51  
52 21. Edvardsson, D., Winblad, B., Sandman, P.O. Person-centred care of people with  
53 severe Alzheimer's disease: current status and ways forward. *Lancet Neurol*, 2008; 4,  
54 362-7. doi:10.1016/S1474-4422(08)70063-2.  
55  
56  
57  
58  
59  
60

- 1  
2  
3 22. Clissett, P., Porock, D., Harwood, R.H., et al. The challenges of achieving person-  
4 centred care in acute hospitals: a qualitative study of people with dementia and their  
5 families. *International Journal of Nursing Studies*. 2013; (11):1495-503. doi:  
6  
7 10.1016/j.ijnurstu.2013.03.001. <http://dx.doi.org/10.1016/j.ijnurstu.2013.03.001>  
8  
9  
10  
11 23. Clarke, A., Hanson, E. J. & Ross, H. Seeing the person behind the patient:  
12 enhancing the care of older people using a biographical approach, *Journal of*  
13 *Clinical Nursing*, 2003; 12, 697-706.  
14  
15 <http://www.ncbi.nlm.nih.gov/pubmed/12919216>.  
16  
17  
18  
19  
20 24. Day, K., Carreon, D. & Stump, C. The therapeutic design of environments for people  
21 with dementia. *The Gerontologist*. 2000; 40, 4, 397-416.  
22  
23 <http://www.ncbi.nlm.nih.gov/pubmed/10961029>.  
24  
25  
26  
27 25. Lawton, M. P. The physical environment of the person with Alzheimer's disease.  
28 *Aging & Mental Health*, 2001; 5(2), 56-64.  
29  
30 <http://www.ncbi.nlm.nih.gov/pubmed/11513499>.  
31  
32  
33 26. Overshott, R., Burns, A., Winblad, B. Non-pharmacological treatment of severe  
34 dementia: An Overview. (Eds.). This is chapter 13 in '*Severe dementia*' John,  
35 Wiley & Sons Ltd. Chichester. 2006;.164-175. doi: 10.1002/0470010568.ch13.  
36  
37  
38  
39  
40 27. Edvardsson, D., Fetherstonhaugh, D., Nay, R. (2010). Promoting a continuation  
41 of self and normality: person-centred care as described by people with dementia,  
42 their family members and aged care staff. *Journal of Clinical Nursing*, 19, 2611-  
43 2618. doi: 10.1111/j.1365-2702.2009.03143.x  
44  
45  
46  
47  
48  
49 28. Whittamore, K.H., Goldberg, S.E., Gladman, J., et al. The diagnosis, prevalence  
50 and outcome of delirium in a cohort of older people with mental health problems  
51 on general hospital wards. *International Journal of Geriatric Psychiatry*, doi:  
52 10.1002/gps.3961.  
53  
54  
55  
56  
57  
58  
59  
60

- 1  
2  
3  
4  
5  
6  
7  
8  
9  
10  
11  
12  
13  
14  
15  
16  
17  
18  
19  
20  
21  
22  
23  
24  
25  
26  
27  
28  
29  
30  
31  
32  
33  
34  
35  
36  
37  
38  
39  
40  
41  
42  
43  
44  
45  
46  
47  
48  
49  
50  
51  
52  
53  
54  
55  
56  
57  
58  
59  
60
29. Borbasi, S., Jones, J., Lockwood, C., et al. Health professionals' perspectives of providing care to people with dementia in the acute setting: Toward better practice. *Geriatric Nursing*, 2006, 27,5, 300-8.  
<http://www.ncbi.nlm.nih.gov/pubmed/17045129>.
30. Adams, T. & Gardiner, P. Communication and interaction within dementia care triads. Developing a theory for relationship person-centred care. *Dementia*, 2005; 4 (2), 185-205. doi: 10.1177/1471301205051092.
31. Nolan, M.R., Davies, S., Brown, J., et al. Beyond person-centered care: a new vision for gerontological nursing. *J Clin Nurs*.2004; 13,3a,45-53.  
[http://www.ssiacymru.org.uk/resource/9\\_n\\_Beyond\\_Person\\_Centred\\_Care.pdf](http://www.ssiacymru.org.uk/resource/9_n_Beyond_Person_Centred_Care.pdf).
32. Tolson, D., Smith, M., Knight, P. An investigation of the components of best nursing practice in the care of acutely ill hospitalized older patients with coincidental dementia: a multi-method design. *Journal of Advanced Nursing*, 1999; 30, 1127-36.  
<http://onlinelibrary.wiley.com/doi/10.1046/j.1365-2648.1999.01194.x/pdf>.
33. Bradshaw, L.E., Goldberg, S.E., Schneider, J.M., et al. Carers' for older people with co-morbid cognitive impairment in general hospital: characteristics and psychological well-being. *Int J Geriatr Psychiatry*, 2013; 28(7):681-90. doi: 10.1002/gps.3871.
34. Li, H., Powers, B.A., Melnyk, B.M., et al. Randomized Controlled Trial of CARE: An Intervention to Improve Outcomes of Hospitalized Elders and Family Caregivers. *Research in Nursing & Health*, 2012; 35, 533–549. doi: 10.1002/nur.21491.
35. Waller, S. (2012). Redesigning wards to support people with dementia in hospital. *Nursing Older People*. 24,2, 16-21.  
<http://nursingolderpeople.rcnpublishing.co.uk/archive/article-redesigning-wards-to-support-people-with-dementia-in-hospital>.

- 1  
2  
3 36. Nufer, T.W., Spichiger, E. How family carers of people with dementia experienced  
4 their stay on an acute care facility and their own collaboration with professionals: a  
5 qualitative study. *Pflege*. 2011; 24, 4, 229-37. doi: 10.1024/1012-5302/a000130.  
6  
7  
8  
9  
10 37. Lindhardt, T., Nyber, P., Hallberg, I.R. Collaboration between relatives of elderly  
11 patients and nurses and it's relation to satisfaction with the hospital care  
12 trajectory. *Scand J Caring Sci*. 2008; 22,4, 507-19. doi: 10.1111/j.1471-  
13 6712.2007.00558.x.  
14  
15  
16  
17  
18 38. Tadd, W., Hillman, A., Calnan, S., et al. Dignity in Practice: An exploration of the  
19 care of older adults in acute NHS Trusts. (A research summary). NIHR Service  
20 Delivery and Organisation Programme. 2011.  
21  
22 www.sdo.nhr.ac.uk/projdetails.php?ref=08-1819-218.  
23  
24  
25  
26  
27 39. Care Quality Commission. Dignity and nutrition inspection programme: National  
28 overview. 2011.  
29  
30  
31 [http://www.cqc.org.uk/sites/default/files/media/documents/20111007\\_dignity\\_and](http://www.cqc.org.uk/sites/default/files/media/documents/20111007_dignity_and_nutrition_inspection_report_final_update.pdf)  
32 [\\_nutrition\\_inspection\\_report\\_final\\_update.pdf](http://www.cqc.org.uk/sites/default/files/media/documents/20111007_dignity_and_nutrition_inspection_report_final_update.pdf).  
33  
34  
35  
36 40. Royal College Nursing (RCN). Dementia: Commitment to the care of people with  
37 dementia in hospital settings. London. 2013.  
38  
39  
40 [http://www.rcn.org.uk/\\_data/assets/pdf\\_file/0011/480269/004235.pdf](http://www.rcn.org.uk/_data/assets/pdf_file/0011/480269/004235.pdf).  
41  
42  
43 41. Alzheimer's Society. Dementia 2012: A national challenge. London. Alzheimer's  
44 Society. 2012. <http://www.alzheimers.org.uk/dementia2012>  
45  
46  
47  
48  
49  
50  
51  
52  
53  
54  
55  
56  
57  
58  
59  
60

**Appendix 1: Themes identified from interviews with family carers of hospital patients with dementia**

| Categories                              | Theme                                        |
|-----------------------------------------|----------------------------------------------|
| Caring for people with Dementia         | Staff knowledge of dementia                  |
|                                         | Staff attitudes towards people with dementia |
|                                         | Appropriate delivery of dementia care        |
|                                         | Inexperienced in delivering dementia care    |
| Communication with health professionals | Being informed                               |
|                                         | Carer expectations                           |
|                                         | Hospital staff approachable                  |
|                                         | Carers' questions answered                   |
|                                         | Staff distant                                |
|                                         | Staff approached carers                      |
|                                         | Personal profile documentation               |
| Treatment                               | Medical treatment                            |
|                                         | Fundamental nursing care                     |
|                                         | Toileting issues                             |
|                                         | Safety and protection                        |
|                                         | Night time issues                            |
|                                         | Admission                                    |
|                                         | End of life care                             |
|                                         | Discharge arrangements                       |
|                                         | Care package                                 |
| Meals and eating                        |                                              |

1  
2  
3  
4  
5  
6  
7  
8  
9  
10  
11  
12  
13  
14  
15  
16  
17  
18  
19  
20  
21  
22  
23  
24  
25  
26  
27  
28  
29  
30  
31  
32  
33  
34  
35  
36  
37  
38  
39  
40  
41  
42  
43  
44  
45  
46  
47  
48  
49  
50  
51  
52  
53  
54  
55  
56  
57  
58  
59  
60

|                        |                                   |
|------------------------|-----------------------------------|
|                        | Pain relief                       |
| Activities and boredom | Appreciate of activities offered  |
|                        | Little stimulus for patients      |
|                        | Too ill to engage in activities   |
|                        | Boredom                           |
| Ward environment       | Decor and cleanliness             |
|                        | Personalised patient surroundings |
|                        | Day room                          |
|                        | Sensory room                      |
|                        | Ward being special                |
| Family carers          | Relationship to the patient       |
|                        | Visiting times                    |
|                        | Involved in hospital care         |
|                        | Carer concerns                    |
|                        | Improving care                    |

---

1  
2  
3 **Delivering Dementia Care Differently. Evaluating the differences and similarities**  
4 **between a specialist medical and mental health unit and standard acute care wards: A**  
5 **qualitative study of family carers' perceptions of quality of care.**  
6  
7  
8

9  
10 Karen Spencer <sup>1</sup>, Pippa Foster <sup>1</sup>, Kathy H. Whittamore <sup>2</sup>, Sarah E. Goldberg <sup>1</sup>, Rowan H.  
11 Harwood <sup>1-2</sup>.  
12

13  
14  
15 <sup>1</sup> Division of Rehabilitation and Ageing, University of Nottingham. NG7 2UH. UK.  
16

17  
18 <sup>2</sup> Health Care of Older People, Nottingham University Hospitals NHS Trust, Queen's  
19 Medical Centre, Nottingham. NG7 2UH. UK.  
20  
21  
22

23  
24  
25  
26  
27 Correspondence to:

28  
29  
30 Professor Rowan Harwood

31  
32  
33 Health Care of Older People, Nottingham University Hospitals NHS Trust, Queen's Medical  
34 Centre, Nottingham. NG7 2UH.  
35  
36

37  
38 Tel: +44 115 924 9924 ext 61412/62511 Fax: +44 115 970 9947  
39

40  
41 Email: [rowan.harwood@nuh.nhs.uk](mailto:rowan.harwood@nuh.nhs.uk)  
42

43  
44 Word Count: 4,808  
45  
46  
47  
48  
49  
50  
51  
52  
53  
54  
55  
56  
57  
58  
59  
60

1  
2  
3 **Delivering Dementia Care Differently. Evaluating the differences and similarities**  
4 **between a specialist medical and mental health unit and standard acute care wards: A**  
5 **qualitative study of family carers' perceptions of quality of care.**  
6  
7  
8  
9

10 **ABSTRACT**  
11

12  
13 **Objectives:** To examine in depth carers' views and experiences of the delivery of patient care  
14 for people with dementia or delirium in an acute general hospital, in order to evaluate a  
15 specialist Medical and Mental Health Unit (MMHU) compared with standard hospital wards.  
16 **This qualitative study complemented the quantitative findings of a randomised controlled**  
17 **trial.**  
18  
19

20 **Design:** Qualitative semi-structured interviews were conducted with carers of patients with  
21 **cognitive impairment admitted to hospital over a four month period.**  
22  
23

24  
25 **Setting:** A specialist MMHU was developed in an English National Health Service acute  
26 hospital aiming to deliver best-practice care. Specialist mental health staff were integrated  
27 with the ward team. All staff received enhanced training in dementia, delirium and person-  
28 centred care. A programme of purposeful therapeutic and leisure activities was introduced.  
29 The ward environment was optimised to improve patient orientation and independence. A  
30 proactive and inclusive approach to family carers was encouraged.  
31  
32  
33  
34  
35  
36  
37  
38  
39  
40  
41  
42  
43

44 **Participants:** Forty carers' who had been recruited into a randomised controlled trial  
45 comparing the MMHU with standard wards.  
46  
47  
48

49  
50 **Results:** The main themes identified related closely to family carers' met or unmet  
51 expectations and included: activities and boredom; staff knowledge; dignity and fundamental  
52 care; the ward environment; and communication between staff and carers. Carers from  
53 MMHU were aware of, and appreciated, improvements relating to activities, the ward  
54  
55  
56  
57  
58  
59  
60



1  
2  
3 environment and staff knowledge and skill in the appropriate management of dementia and  
4  
5 delirium. However, communication and engagement of family carers was still perceived as  
6  
7 insufficient.  
8  
9

10 **Conclusion:** Our data demonstrates the extent to which the MMHU succeeded in its goal of  
11  
12 providing best practice care and improving carer experience, and where deficiencies  
13  
14 remained. Neither setting was perceived as wholly good or wholly bad, however greater  
15  
16 satisfaction (and less dissatisfaction) with care was experienced by carers' from MMHU  
17  
18 compared with standard care wards.  
19  
20  
21  
22  
23  
24  
25  
26  
27  
28  
29  
30  
31  
32  
33  
34  
35  
36  
37  
38  
39  
40  
41  
42  
43  
44  
45  
46  
47  
48  
49  
50  
51  
52  
53  
54  
55  
56  
57  
58  
59  
60

## ARTICLE SUMMARY

### Article focus

- One in three acute hospital admissions is of a confused older person and in recent years various reports have called for improvements in care for people with dementia and delirium admitted to hospital.
- We interviewed family carers of people with dementia or delirium in an acute general hospital to examine in depth their views and experiences of the delivery of patient care, in order to evaluate a specialist Medical and Mental Health Unit (MMHU) compared with standard hospital wards.

### Key messages

- Family carers identified and appreciated various aspects of care that were introduced as part of a service innovation that aimed to deliver best practice care for acutely ill people with delirium and dementia, including an improved environment, level of patient activity, and staff knowledge and skills, compared with experiences reported from standard care wards. However, communication with staff, especially nurses, and engagement with family carers was still considered unsatisfactory.
- New approaches to communication and engagement with family carers are required, including the assessment of expectations and the giving and receiving of information. Meeting this need will require changes to the way acute wards operate, and the re-prioritisation of staff time to enable this activity.

### Strengths and limitations of this study

- This study was undertaken alongside a randomised controlled trial, so patients and carers were to an extent matched for social and clinical characteristics. Wide-ranging semi-structured interviews permitted exploration of experiences, and uncovered areas of concern that might not have been anticipated in advance.
- Data are limited by coming from a single hospital. Studying the experience of patients with cognitive impairment is difficult because of memory, language and other cognitive problems. Family carers represent a suitable proxy, but have a partial view of the care delivered to a patient.
- Interviews were done some weeks after hospitalisation, which might influence perceptions and interpretations, and which aspects of the story were related to the interviewer. Family carers were sometimes interviewed with the patient participant present, which might limit what was said openly. Analysis of qualitative data is open to different interpretations and the possibility of preconception.

1  
2  
3 **Delivering Dementia Care Differently. Evaluating the differences and similarities**  
4 **between a specialist medical and mental health unit and standard acute care wards: A**  
5 **qualitative study of family carers' perceptions of quality of care.**  
6  
7  
8  
9

10 **Introduction**  
11

12  
13 The prevalence of dementia is increasing worldwide.<sup>1</sup> One in three acute hospital admissions  
14 is of a confused older person.<sup>2</sup> In recent years various reports have called for improvements  
15 in care for people with dementia admitted to hospital.<sup>3-7</sup> The Alzheimer's Society<sup>8</sup> identified  
16 key areas of dissatisfaction for carers relating to: a lack of person-centred care (PCC); nurses  
17 not recognising or understanding dementia; a lack of dignity and respect; patients not being  
18 helped to eat and drink; a lack of opportunity for social interaction and not enough carer  
19 collaboration in decision-making. Qualitative research exploring carers' perceptions of acute  
20 hospital care for people with dementia suggest that their experiences are variable. One study  
21 concluded that perceptions of poor care were linked to expectations and relationships with  
22 staff<sup>9</sup> Staff report lacking skills and confidence in caring for confused older people.<sup>8,10</sup>  
23  
24 Little previous research has evaluated attempts to improve the quality of care for confused  
25 older people in acute hospitals.  
26  
27  
28  
29  
30  
31  
32  
33  
34  
35  
36  
37  
38  
39

40  
41 A specialist Medical and Mental Health Unit (MMHU) was developed on an acute geriatric  
42 medical ward aiming to provide best practice care for patients with delirium and dementia  
43 following admission to a general hospital for acute medical care<sup>11</sup>. The intervention ward  
44 enhanced five aspects of care. Additional specialist staff were employed (mental health  
45 nurses, and mental health specialist occupational, physiotherapist and speech and language  
46 therapists, and a psychiatrist) alongside acute hospital staff. Staff received enhanced training  
47 in dementia, delirium and PCC following the Bradford Dementia Group approach<sup>12-13</sup> using  
48 a combination of didactic and ward-based learning, including co-working with the mental  
49  
50  
51  
52  
53  
54  
55  
56  
57  
58  
59  
60

1  
2  
3 health specialist staff. A programme of purposeful activities matched to retained abilities was  
4 introduced (such as dominoes, quizzes, crafts, ball games, music and reminiscence, getting  
5 dressed and social eating).<sup>14</sup> The ward environment was optimised with the aim of improving  
6 patient orientation and independence. A proactive and inclusive approach to family carers  
7 was encouraged, with more communication, liberal visiting times and the invitation to engage  
8 in day to day care. Patient personal profile documentation was developed to be completed by  
9 family carers. A series of information leaflets were designed and made available to carers.

10  
11  
12  
13  
14  
15  
16  
17  
18  
19 The MMHU was evaluated in a controlled trial that randomised 600 confused patients over  
20 age 65 who had been admitted for emergency medical care to the unit or standard care.<sup>15-16</sup>  
21  
22  
23 Standard care wards comprised 70% acute geriatric medical and 30% general medical wards.  
24  
25  
26 This study suggested improved patient experience and family carer satisfaction, but no  
27 differences in health status outcomes. This qualitative study contributes to the evaluation by  
28 exploring carers' accounts of their experiences of hospital care, **which is both an outcome in**  
29 **itself, and a check on the 'fidelity' of the intervention.**

## 30 31 32 33 34 35 36 **Methods**

### 37 38 39 *Sampling and Data Collection*

40  
41  
42 **Recruitment to the qualitative study took place over the final four months of the trial. During**  
43 **this time family carers of patients recruited into the trial were asked if they would also consent to**  
44 **taking part in an interview study. If they agreed, participants were approached by the qualitative**  
45 **researcher, depending only on researcher availability for interviews, until 20 were recruited**  
46 **from each setting. All those approached agreed to take part. Recruitment had to be completed**  
47 **whilst the trial was on-going, and we chose 20 per group as likely to be sufficient to achieve**  
48 **saturation, although full analysis of data was only completed after recruitment ceased. Carers**  
49 **gave written consent, and took part in a face-to-face semi-structured interview. An interview**  
50  
51  
52  
53  
54  
55  
56  
57  
58  
59  
60

1  
2  
3 guide was developed and checked in a pilot interview. Initially topics were selected from the  
4 literature, and subsequent topics were added if they arose during interviews. Topics included:  
5 patient admission and settling in to the ward; carer relationship with staff; the ward  
6 environment; patients' daily routines such as sleeping, meals, hygiene and activities; privacy  
7 and dignity; care and medical treatment; discharge planning. Participants were encouraged to  
8 discuss both what they considered worked well and not so well. A series of prompts was  
9 devised to encourage participants to elaborate in more detail when asked a general question.  
10 Interviews were conducted in the carer's home and consent was obtained to audio record  
11 interviews. Participants were reassured that privacy, confidentiality and identity would be  
12 protected. The interviewer was an experienced medical sociologist, not involved in delivering  
13 clinical care. Approval was received from a research ethics committee and hospital research  
14 governance department.

### 30 *Data Analysis*

31  
32 Interviews were transcribed verbatim, and Nvivo 10 software was used to facilitate analysis.  
33 Data were analysed thematically using a framework analysis that allowed a systematic  
34 process to be followed in the development of knowledge and theory.<sup>17</sup> Framework analysis is  
35 a flexible approach utilised in health service research that allows all data to be collected and  
36 then analysed.<sup>18</sup> The organisation of data within this approach involved a five stage process:  
37 1) familiarization; 2) identifying a thematic framework; 3) indexing; 4) charting; and 5)  
38 mapping and interpretation.<sup>17</sup> Familiarization with data involved constant comparison across  
39 data to identify categories and themes. Coding transcripts to identify recurrent statements and  
40 expressed feelings formed the basis of the thematic framework (see, appendix 1). Themes  
41 were compared and contrasted between settings via indexing, charting and mapping to  
42 provide a detailed understanding and interpretation of participants' experiences, and if and  
43 how the intervention added to carers' perspectives of quality of care. All authors met on a  
44  
45  
46  
47  
48  
49  
50  
51  
52  
53  
54  
55  
56  
57  
58  
59  
60

1  
2  
3 regular basis to discuss the development of codes, themes, categories and theories about the  
4  
5 phenomenon being studied.  
6  
7

## 8 **Results**

### 9 *Participants*

10  
11  
12  
13  
14 20 carers were interviewed from the MMHU, whose relationship to patients was: two  
15  
16 spouses, thirteen daughters, two sons, one brother and two granddaughters. The 20 carers  
17  
18 from standard care were: six spouses, six daughters, one granddaughter, five sons, one sister  
19  
20 and one nephew. The patients were seven males and thirteen females from MMHU, mean age  
21  
22 87 (range 83-97), and eleven males and nine females from standard care, mean age 85 (range  
23  
24 69-95).  
25  
26

### 27 *Findings*

28  
29  
30  
31 **Data saturation of key themes was achieved by interview fifteen (MMHU) and interview**  
32  
33 **eighteen (standard care).** The themes identified as being important in exploring differences  
34  
35 and similarities between participants' experiences of quality of care in the two groups were:  
36  
37

- 38  
39 (1) Activities and boredom;  
40  
41  
42 (2) Staff knowledge;  
43  
44  
45 (3) Dementia, dignity and fundamental care;  
46  
47  
48 (4) Ward environment;  
49  
50  
51 (5) Communication **between carers and staff**;  
52  
53  
54 (6) Carer expectations.  
55  
56  
57  
58  
59  
60

1  
2  
3 *Activities and boredom*  
4

5  
6 Carers from both groups commented on activities offered and whether they perceived that  
7  
8 patients experienced boredom. Relatives from MMHU made more references to patients  
9  
10 being engaged in activities compared with standard care; half of these relatives were aware,  
11  
12 or appreciative, of patient involvement in activities on the ward:  
13

14  
15  
16 ‘The activity co-ordinator put on some old tunes in the day room, like Frank Sinatra  
17  
18 everyone was having a bit of a giggle actually, because she loves music and that stuff,  
19  
20 so that’s good’ (Daughter of 84 year old, female, MMHU patient).  
21  
22

23 Six carers highlighted that patients were too ill to have engaged with activities, or would not  
24  
25 have wanted to be involved in these:  
26  
27

28  
29 ‘We did see the activity room, and I think, possibly, if he’d been well enough to just  
30  
31 sit in there whilst things were going on, he would have enjoyed that’ (Daughter of 95  
32  
33 year old, male, MMHU patient).  
34  
35

36 Four MMHU carers stated that their relative would not have had any lasting memory of  
37  
38 activities, and this meant family members would not have been aware what activities their  
39  
40 relative had been involved with. Others were aware that patients had taken part, and felt that  
41  
42 even if they had no recollection of this, patients had nevertheless enjoyed the activities at the  
43  
44 time, which carers considered positive:  
45  
46

47  
48 ‘We went in and she was having her hair done, that person [activity coordinator] said  
49  
50 that mum had won the film quiz the night before, and mum couldn’t even remember  
51  
52 doing it. What a shame that whenever we ask her, she can’t remember having done  
53  
54 anything’ (Daughter of 87 year old, female, MMHU patient).  
55  
56  
57  
58  
59  
60



1  
2  
3 Five relatives from standard care commented that there was little stimulus for patients and  
4  
5 some considered that this left patients bored. Others felt that having activities could have  
6  
7 prevented behaviours such as wandering or vocalisation. Some standard care relatives  
8  
9 referred to the need for the kinds of activities that were being offered on MMHU. A few  
10  
11 relatives from MMHU were aware of activities, but felt dissatisfaction because their relative  
12  
13 had not had a chance to engage in them.  
14

### 15 16 17 *Staff knowledge* 18

19  
20 There were noticeable differences between the two groups relating to staff knowledge of  
21  
22 dementia and delivery of professional care. Carers of MMHU patients described staff as  
23  
24 being ‘well prepared’ for dealing with confused patients, displaying patience and  
25  
26 compassion. Respondents noted that patients who liked to wander were guided by staff  
27  
28 when walking up and down rather than constantly being returned to their bed space,  
29  
30 behaviour observed by carers on standard care wards. A few respondents praised the support  
31  
32 of mental health nurses on MMHU in defusing situations, although some family carers were  
33  
34 unaware that MMHU had special staffing:  
35  
36

37  
38 ‘One night Grandma was in quite a strop, she was having a tantrum and a nurse came  
39  
40 over, she didn’t have to and I thought it was nice that she came over and she was  
41  
42 trying to calm her. I thought she gave that little bit extra’. (Granddaughter of 91 year  
43  
44 old, female MMHU patient).  
45  
46  
47

48  
49 Standard care respondents felt that some staff displayed a negative attitude towards confused  
50  
51 patients. Participants felt that staff had little understanding and limited training in dementia  
52  
53 care which carers felt resulted in patients being ignored, shouted at or threatened when staff  
54  
55 were faced with uncooperative or challenging situations. In some cases this led to  
56  
57 confrontation between nurses and family carers who reacted to what they perceived as  
58  
59  
60

1  
2  
3 unacceptable staff attitudes towards patients. These carers further highlighted that they  
4  
5 hadn't formally complained for fear of repercussions towards their relative:  
6  
7

8 'She [health care assistant] kept shouting at him, turn over, turn over I can't get to  
9  
10 you. So eventually I opened the curtains and said that man's confused he can't  
11  
12 understand you. She [health care assistant] knew I was sitting outside the curtain and  
13  
14 it didn't deter her, she was really shouting'. (Wife of 69 year old, male, standard care  
15  
16 patient).  
17  
18  
19

20 Carers further described how they felt it necessary to offer individualised support and  
21  
22 guidance to health professionals in dealing with patients, as they considered staff to be  
23  
24 lacking in dementia expertise. Some participants felt they needed to provide one-to-one  
25  
26 personal care as they perceived staff were unable to fulfil this role due to their inexperience.  
27  
28 One carer from standard care commented that staff had inferred that the ward was a 'mixed  
29  
30 medical ward that was not equipped to deal with dementia patients' who were considered  
31  
32 time consuming, as staff would have to have 'extra patience with them'. Some carers  
33  
34 considered offering one-to-one care as an extension of their 'main carer' role which  
35  
36 transferred with them from home to hospital:  
37  
38  
39

40 'If he was on a ward where they understood him better and would be able to wash and  
41  
42 dress him without me having to go up there, it would have been different'. (Daughter  
43  
44 of 83 year old, male, standard care patient).  
45  
46  
47

#### 48 *Dementia, dignity and fundamental care*

49

50  
51 For many family carers an important aspect of satisfaction involved fundamental elements of  
52  
53 personal care such as elimination, washing and dressing, eating and drinking. Participants  
54  
55 believed that such personal and intimate care should be delivered sensitively and that  
56  
57  
58  
59  
60

1  
2  
3 patient's dignity should be protected. MMHU carers (14) and standard care (10) participants  
4  
5 stated that they witnessed appropriate curtain use that ensured patients received privacy when  
6  
7 needed. Negative comments from four MMHU carers and ten standard care participants  
8  
9 considered that their loved ones had received less dignified care. Concerns from MMHU  
10  
11 participants ranged from patients dentures not being cleaned by staff, respondents feeling that  
12  
13 it was inappropriate for male nurses to attend the toileting needs of female patients and a  
14  
15 patient, being discharged 'in her night gown, unwashed and smelling'. Complaints raised by  
16  
17 standard care participants, related to patients being found by visitors with excrement under  
18  
19 their fingernails and used incontinence pads found by patients bed sides. Instances were  
20  
21 mentioned of patients undressing in public bays, toilet doors being left open exposing female  
22  
23 patients to passing male patients and visitors, a patient being found in wet bed sheets or not  
24  
25 washed. This was considered due to staff inexperience in delivering care to confused patients:  
26  
27  
28

29  
30 'I had to clean her nails because she had excrement all under her fingernails, the  
31  
32 nurse said she'd put her on a bed pan and then caught her getting off, trying to clear it  
33  
34 up'. (Son of 87 year old, female, standard care patient).  
35  
36

37  
38 One standard care patient who had recovered from delirium and who was present during an  
39  
40 interview with his family carer commented that he had been embarrassed and had not wanted  
41  
42 to eat to avoid emptying his bowels after a nurse had not cleaned him properly during a visit to  
43  
44 the toilet.  
45  
46

47  
48 Carers from both MMHU (11) and standard care wards (12) expressed satisfaction with the  
49  
50 hospital food, and positive comments related to the quality, menu choice and patients  
51  
52 enjoyment of meals. Participants from across the sample further highlighted that if frail older  
53  
54 patients displayed a poor appetite, hospital staff offered alternative snacks and sandwiches,  
55  
56 which carers appreciated. Five carers of patients on MMHU expressed concern about staff  
57  
58  
59  
60

1  
2  
3 not assisting patients with eating and drinking. Dissatisfaction expressed from ten standard  
4  
5 care participants mainly related to lack of understanding, help and encouragement with eating  
6  
7 and/or drinking for confused older patients:  
8  
9

10 ‘She [patient] wasn’t drinking sufficiently, they [staff] were giving her a cup of tea  
11  
12 but she couldn’t hold it, she’d spill it all down herself. And they [staff] weren’t doing  
13  
14 anything to help when it was mealtime, they [staff] put the meals out and they  
15  
16 [patients] seemed to be left to it’. (Son of 93 year old, female, standard care patient).  
17  
18  
19

20 A small number of carers from MMHU (2) and standard care (4) questioned whether  
21  
22 confused older patients were in a position to make menu choices about the food they usually  
23  
24 chose and enjoyed. Carers commented that staff had probably decided on behalf of patients  
25  
26 and would have appreciated more involvement.  
27  
28

### 29 *Ward Environment*

30  
31  
32 Carers from both MMHU and standard care generally described the wards as ‘clean and tidy’.  
33  
34 Less positive comments expressed by three carers of patients on standard care related to  
35  
36 décor or minor cleanliness issues. Comments made by relatives from MMHU suggested  
37  
38 carers were appreciative of some of the changes made to the ward environment that involved  
39  
40 improving the décor and personalising patients’ surroundings. Carers were also positive  
41  
42 about the day and activities room but very few were aware of the private sensory room.  
43  
44 Some carers also considered the availability of information leaflets to be a helpful  
45  
46 educational resource:  
47  
48  
49

50  
51 ‘There’s more pictures, and that’s nice and there’s an activities board which is quite  
52  
53 nice as well and there’s a bit more colour. They’ve [patients] all have theses memory  
54  
55  
56  
57  
58  
59  
60

1  
2  
3 boxes behind the bed. Mum hasn't got anything in there yet, but I've got photos that I  
4  
5 could put in there. (Daughter of 84 year old, female, MMHU patient).  
6  
7

8 *Communication between carers and staff*  
9

10  
11 Relatives of patients on both MMHU and standard care wards had positive and negative  
12 experiences of communication and engagement with ward staff, but in general wanted more  
13 regular communication. Carers' perceptions of their relationship with staff closely  
14 corresponded with their met or unmet expectations, which were influenced by the level of  
15 cognitive impairment and communication difficulties experienced by patients. A similar  
16 number of carers of both MMHU (12) and standard care patients (11) described positive  
17 experiences, including certain staff being informative, helpful, friendly or approachable.  
18 These positive experiences influenced their perceptions of quality of care. However,  
19 experiences with different staff members could vary greatly.  
20  
21  
22  
23  
24  
25  
26  
27  
28  
29  
30

31  
32 'We saw [the consultant], who was excellent, he was informative, he was helpful, he  
33 was sympathetic', but there was one nurse that came across as abrasive and therefore  
34 you're a bit wary about asking too many questions, but the auxiliary nurse was  
35 lovely.... (Son of 87 year old, female, standard care patient).  
36  
37  
38  
39  
40

41  
42 Family members who described poor relationships or ineffective communication with staff  
43 indicated greater dissatisfaction with the quality of care they experienced. The main  
44 grievance cited by carers concerned the lack of being kept informed, which led some to feel  
45 neglected and ignored. This point was particularly emphasised by carers who found it  
46 difficult or impossible to get information from the patient themselves:  
47  
48  
49  
50  
51  
52  
53  
54  
55  
56  
57  
58  
59  
60

1  
2  
3 'I mean, if people like my dad are in here because of their age and memory loss  
4 really, they [staff] should be talking to the family, shouldn't they? Or somebody  
5 should'. (Daughter of 87 year old male, MMHU patient).  
6  
7  
8  
9

10 Some family members believed that staff should voluntarily provide information on patient's  
11 care and progress rather than families feeling obligated to initiate interactions. Carers who  
12 were reluctant to approach staff described feeling anxious about being left uninformed:  
13  
14  
15

16  
17  
18 'I did have to ask to find out what was going on, and I know the ward was busy and  
19 you don't want to interfere with people when they're working sort of, but it's kind of,  
20 when you're feeling that anxious, you just want that little bit more reassurance that,  
21 yes, somebody will come and speak to you'. (Granddaughter of 85 year old, male,  
22 MMHU patient).  
23  
24  
25  
26  
27  
28

29 Lack of communication and information sharing between staff and family carers was also  
30 evident at discharge on both MMHU (9) and standard care (10). Approximately half of the  
31 carers described the discharge experience in a number of negative ways including: delayed,  
32 rushed, and undignified. Carers did appreciate that problems were often beyond the control  
33 of ward staff themselves and related to organisational barriers:  
34  
35  
36  
37  
38  
39

40  
41 'Discharge was a bit belated. Largely because she had to stay there [in hospital] until  
42 the aftercare package with the intermediate care team could be set up to come and  
43 supervise her at home'. (Husband of 75 year old female, MMHU patient).  
44  
45  
46  
47  
48

49 In discussions with carers about whether staff had engaged with them about patients'  
50 backgrounds and interests, both positive and negative comments were noted from  
51 respondents. Half of MMHU carers (10) commented that they had been approached by staff  
52 to complete personal profile documentation about patients' past lives. Many considered that  
53  
54  
55  
56  
57  
58  
59  
60

1  
2  
3 they were a good idea although a couple of family members mentioned that they had  
4  
5 completed them later than expected, and one respondent speculated whether staff referred to  
6  
7 them or not:  
8  
9

10 'I filled one form in I answered, you know, her interests, what she enjoyed doing, I do  
11  
12 think it's a good idea. The girl [nurse] that gave me the form said it was, to help them  
13  
14 understand the person, to get to know the lady in the bed'. (Daughter of 87 year old,  
15  
16 female, MMHU patient).  
17  
18  
19

20 Staff on standard care wards did not routinely complete personal profile documentation with  
21  
22 family carers, but respondents were asked if they felt staff had got to know any background  
23  
24 information about patients. Most (15) family carers from standard care commented that staff  
25  
26 had not enquired about patients' personal lives other than past medical history (compared  
27  
28 with four MMHU participants). A few participants considered that it would be difficult for  
29  
30 nurses to get to know patients due to the short length of stay in an acute setting and lack of  
31  
32 continuity in care due to shift length and patterns. Some family carers felt that nurses were  
33  
34 too busy to have much interaction with patients and that conversation would focus around  
35  
36 general tasks such as giving injections, changing drips and other medical treatments:  
37  
38  
39

40  
41 'They [nurses] had conversations with me...what she'd been up to, but not much  
42  
43 conversation about her past or anything like that'. (Granddaughter of 98 year old,  
44  
45 female, standard care patient).  
46  
47

#### 48 *Carer Expectations*

49

50  
51 Relatives' expectations of the quality of care they presumed patients would receive on the  
52  
53 ward (formed prior to patient admission) compared with actual experiences (determined by  
54  
55 perceptions formed during and after discharge) influenced their satisfaction with the ward.  
56  
57  
58  
59  
60

1  
2  
3 The five themes identified in this analysis (activities, staff knowledge, fundamental care,  
4 ward environment and communication between staff and carers) all related to expectations,  
5 which formed a cross-cutting theme. In order to examine unmet expectations, participants  
6 were asked to make suggestions about what future improvements could be made to the ward.  
7 Several family carers MMHU (6) and standard care (7) highlighted aspects of communication  
8 and collaboration between staff and carers:  
9  
10  
11  
12  
13  
14  
15  
16

17 'I would like it if they [staff] came and introduced themselves. So if they haven't seen  
18 you before, then you're sat by your mother's bed, they should come over and say,  
19 well, I'm the ward sister, or I'm the daily nurse who's looking after her, you know,  
20 sorting her washing [needs] and things like that'. (Son of 93 year old, female,  
21 MMHU patient).  
22  
23  
24  
25  
26  
27  
28

29 Further suggestions included: more patient stimulation, carers being present during ward  
30 rounds, longer visiting hours, having a named nurse, receiving a daily briefing from staff, a  
31 daily diary or check lists for carers, and separate bays for more vocal patients. Family carers  
32 from MMHU and standard care wards had a variety of unique expectations that closely  
33 related to their satisfaction or dissatisfaction with care:  
34  
35  
36  
37  
38  
39  
40

41 'I think it's a lot better for the patient if there's continuity with the same person,  
42 because then you do get to know that patient a lot, a lot better. But it probably won't  
43 work in a hospital situation where I know it's not going to be a one to one situation. It  
44 never will be, because the NHS can't afford it'. (Son of 89 year old, male, standard  
45 care patient).  
46  
47  
48  
49  
50  
51

52 'I thought he would have been better with mental nurse looking after him. To  
53 understand him better, understand his needs, do you know what I mean? Rather than  
54 them saying to me, Well, we've tried to talk to your dad this morning and he's just not  
55  
56  
57  
58  
59  
60



1  
2  
3 having none of it, he's a bit confused....No, he's not confused, he's got dementia,  
4  
5 he's ill. You know, he's got vascular dementia'. (Daughter of 84 year old, male,  
6  
7 standard care patient).  
8  
9

## 10 **Discussion**

11  
12 This qualitative study evaluated an intervention which aimed to improve care for patients  
13 with dementia and delirium admitted to an acute hospital. The main themes identified in  
14 exploring carer satisfaction related closely to their met or unmet expectations and included:  
15 activities and boredom; staff knowledge; dignity and fundamental care; the ward  
16 environment; and communication between staff and carers. Neither setting was perceived as  
17 wholly good or wholly bad, however greater satisfaction (and less dissatisfaction) with care  
18 was experienced by carers' from MMHU compared with standard care wards. Meeting  
19 carers' expectations is an important factor leading to greater satisfaction with patient care.<sup>19</sup>  
20 Clearly developing awareness of carers' expectations/unmet expectations should enable  
21 nursing staff to understand the carers' perspective and improve communication as well as  
22 satisfaction. Carers were aware of improvements relating to activities, the ward environment  
23 and staff knowledge and awareness of the appropriate management of dementia and delirium.  
24 However, in some cases communication and engagement of family carers was still perceived  
25 as insufficient.  
26  
27  
28  
29  
30  
31  
32  
33  
34  
35  
36  
37  
38  
39  
40  
41  
42  
43  
44

45 The MMHU development was an ambitious attempt to overcome previously identified  
46 problems with acute hospital care by acknowledging and attempting to address, a lack of  
47 knowledge and skills, a bland and disorientating environment, a lack of therapeutic and  
48 diversionary activity and better communication and engagement with family carers.<sup>11</sup> The  
49 underlying philosophy was that of PCC, which has been advocated over the past decade in  
50 order to enhance well-being for people with dementia and to avoid distress and associated  
51  
52  
53  
54  
55  
56  
57  
58  
59  
60

1  
2  
3 disturbed behaviours. PPC aims to support emotional and psychological needs by valuing  
4  
5 people with dementia and treating them as individuals, by looking at the world from the  
6  
7 perspective of the person with dementia and by creating a positive social environment.<sup>20, 13</sup>  
8

9  
10 There are various descriptions of PCC and no consensus on its definition or how to apply it  
11  
12 during acute illness.<sup>21-22</sup> Biographical information can be used to promote knowledge of the  
13  
14 person with dementia such as family, occupation, hobbies, likes and dislikes and can help  
15  
16 staff focus on the person as an individual.<sup>23</sup> Personalising dementia patients' surroundings  
17  
18 has been associated with positive effects on behaviour and mood as well as improved  
19  
20 orientation.<sup>24-25,4</sup> Meaningful activity such as reminiscence, games and crafts can foster  
21  
22 social interaction between staff and patients<sup>20,26-27</sup> whilst dressing and social eating provide a  
23  
24 sense of purpose and dignity, and maintains necessary basic daily skills. However, hospitals  
25  
26 are busy, fast-moving and noisy, making them difficult places for people with dementia.<sup>7</sup>  
27  
28 Patients are often ill and dependent<sup>2, 28</sup> and physical medical care is necessarily prioritised.  
29  
30 The necessary medical monitoring and nursing interventions can be misunderstood or seen as  
31  
32 threatening. Length of stay is typically short. These factors limit the scope for delivering PCC  
33  
34 and family engagement.<sup>29</sup>  
35  
36  
37

38  
39 The central role of family carers as stakeholders in the care of people with dementia has been  
40  
41 emphasised many times.<sup>30-32</sup> Carers' experiences of the wards were mediated by many  
42  
43 factors related to the severity of the patients' illness, duration of stay, past experience of  
44  
45 hospitalisation, the length of time spent visiting the ward, their expectations of the care the  
46  
47 ward could provide, competing commitments and carer strain.<sup>33</sup> Family carers wanted an  
48  
49 even greater level of communication and engagement than was achieved on MMHU, despite  
50  
51 this being an explicit goal on the unit (a finding also reported by Li *et al*<sup>34</sup>). Carers were  
52  
53 appreciative when involved in aspects of their relative's care but disillusioned when they felt  
54  
55 excluded or neglected. Relationships between staff (especially nurses) and relatives still need  
56  
57  
58  
59  
60

1  
2  
3 reforming with more partnership and collaboration. Few previous studies have reported  
4 attempts at improvement, and rigorous evaluation is difficult in this field.<sup>35-36</sup> Collaboration,  
5 in terms of shared decision-making and exchange of knowledge and information has been  
6 shown to be particularly important for relatives' satisfaction with hospital care of older  
7 people.<sup>37</sup> Organisational factors have also been identified as impeding the development of  
8 effective nurse-family collaboration include; a task focused culture and workload; the  
9 organisations' focus on risk; shift patterns and length; a lack of training; poor supervision;  
10 resistance to change and bureaucratic issues.<sup>38,10</sup>

### 21 **Strengths and limitations**

22  
23  
24 This study was undertaken alongside a randomised controlled trial, so patients and carers  
25 were to an extent matched for social and clinical characteristics, and illness severity. Wide-  
26 ranging semi-structured interviews permitted exploration experiences in depth, and  
27 uncovered areas of concern for participants that might not have been anticipated in advance.  
28 The data are limited by coming from a single English National Health Service hospital, but  
29 the hospital provided sole emergency medical services for its local population, and is likely to  
30 be representative. Studying the experience of patients with cognitive impairment is difficult  
31 because of memory and language problems, and difficulties perceiving time and abstract  
32 concepts. Family carers are often assumed to be a suitable proxy, but have a very partial view  
33 of the care delivered to a patient. Indeed, they are often aware of this limitation, and it can be  
34 a source of anxiety to them. Interviews were done some weeks after hospitalisation, which  
35 might influence perceptions and interpretations of experiences, and which aspects of the story  
36 were related to the interviewer. Family carers were sometimes interviewed with the patient  
37 participant present, which might limit what was said openly. Analysis of qualitative data is  
38 open to different interpretations and the possibility of preconception.

## Conclusion

Critical reports focusing on dignity and nutrition standards for older patients have prompted an additional focus on patient and carer satisfaction as well as clinical outcomes and safety.<sup>39</sup> Our findings support recent initiatives to improve care in hospitals.<sup>40</sup> Dementia 2012: A national challenge calls for improvements in the general hospital care of people with dementia including a better prepared workforce.<sup>41</sup> The enhancements of care on the MMHU that included enhanced training in dementia, delirium and PCC helped staff deliver dementia care differently and more appropriately and this study provides evidence of its effectiveness. However, the amount of communication required by family carers cannot be underestimated. We found the extent of this surprising and beyond what we had planned for. New approaches to engagement with family carers are required, including the assessment of expectations and the giving and receiving of information. Meeting this need will require major changes to the way acute wards operate, and the re-prioritisation of staff time to enable this activity. Facilitating more hands-on care by family members may provide the *quid pro quo* to enable it within resource-constrained healthcare systems. Organisational development methodologies should be explored in future attempts to implement such changes, alongside more staff-directed education and training interventions, and incorporation in pre-registration education. Nurse leaders will play an important role in creating conditions and fostering a culture that enables and rewards the delivery of 'relationship-centred' care for this population.<sup>31</sup>

ACKNOWLEDGEMENTS AND DISCLAIMER: This paper presents independent research funded by the National Institute for Health Research (NIHR) under its Programme Grants for Applied Research funding scheme (RP-PG-0407-10147). The views expressed are those of the authors and not necessarily those of the National Health Service, the NIHR or the Department of Health. The

1  
2  
3 funders and study sponsors had no role in study design, collection, analysis and interpretation of data;  
4  
5 writing the manuscript; or the decision to submit for publication. The Medical Crises in Older People  
6  
7 study group also included Justine Schneider, Simon Conroy, Anthony Avery, Judi Edmans, Adam  
8  
9 Gordon, Bella Robbins, Jane Dyas, Pip Logan, Rachel Elliott, Matt Franklin.

10  
11  
12 CONFLICT OF INTEREST: None.

13  
14  
15 ETHICAL APPROVAL: The study was approved by the Nottingham research ethics committee.

16  
17  
18 CONTRIBUTORS. RH and KS conceived the study. SG, PF and KW managed the trial and  
19  
20 recruited the participants. KS undertook the interviews, and coded the data. All authors  
21  
22 discussed the coding, and interpretation. KS drafted the manuscript, which was revised by  
23  
24 RH, and approved by all authors. KS is guarantor.

25  
26  
27 DATA SHARING: No additional data available.  
28  
29  
30  
31  
32  
33  
34  
35  
36  
37  
38  
39  
40  
41  
42  
43  
44  
45  
46  
47  
48  
49  
50  
51  
52  
53  
54  
55  
56  
57  
58  
59  
60

## References

1. World Health Organization (WHO). Dementia: a public health priority. 2012.  
[http://www.apps.who.int/iris/bitstream/10665/75263/1/9789241564458\\_eng.pdf](http://www.apps.who.int/iris/bitstream/10665/75263/1/9789241564458_eng.pdf).
2. Goldberg, S.E., Whittamore, K., Harwood, R.H., Bradshaw, L., Gladman, J., Jones, R.G. The prevalence of mental health problems amongst older adults admitted as an emergency to a general hospital. *Age and Ageing*, 2012; 41, 80-86, doi:  
[10.1093/ageing/afr106](https://doi.org/10.1093/ageing/afr106).
3. Royal College of Psychiatrists. Who cares wins: Improving the outcomes for older people admitted to the general hospital: Guidelines for the development of Liaison Mental Health Services for older people. London 2005.  
<http://www.rcpsych.ac.uk/pdf/whocareswins.pdf>.
4. Royal College of Psychiatrists. Report of the National Audit of Dementia Care in General Hospital. Editors: Young, J., Hood, C., Woolley, R., Gandesha, A. & Souza, R. London: Healthcare Quality Improvement Partnership. 2011.  
<http://www.rcpsych.ac.uk/pdf/NATIONAL%20REPORT%20-%20Full%20Report%201201122.pdf>.
5. Department of Health. Living Well With Dementia: A National Dementia Strategy: A National Dementia Strategy. Department of Health. London. 2009.  
<https://www.gov.uk/government/publications/living-well-with-dementia-a-national-dementia-strategy>.
6. Department of Health. Quality outcomes for people with dementia: Building on the work of the national dementia strategy. Department of Health. London. 2010.  
<https://www.gov.uk/government/publications/quality-outcomes-for-people-with-dementia-building-on-the-work-of-the-national-dementia-strategy>.

- 1  
2  
3 7. Royal College of Nursing. Improving quality of care for people with dementia in  
4  
5 general hospitals. RCN, London. 2010.  
6  
7 <http://nursingstandard.rcnpublishing.co.uk/shared/cms/file.asp?e=35&i=172190>.  
8  
9
- 10 8. Alzheimer's Society. Counting the cost: Caring for people with dementia in hospital  
11  
12 ward. Alzheimer's Society. London. 2009.  
13  
14 <http://www.alzheimers.org.uk/countingthecost>  
15
- 16 9. Jurgens, F., Clissett, P., Gladman, J.R.F. & Harwood, R.H. Why are family carers of  
17  
18 people with dementia dissatisfied with general hospital care? A qualitative study.  
19  
20 *BMC Geriatrics*. 2012; 12:57, 1-10; doi: 10.1186/1471-2318-12-57.  
21  
22
- 23 10. Gladman, J., Porock, D., Griffiths, A, Clissett, P., Harwood, R.H., Knight A.,  
24  
25 Kearney, F. Care of Older people with Cognitive Impairment in General Hospitals.  
26  
27 Final report NIHR Service Delivery and Organisation Programme. 2012.  
28  
29 <http://www.netsec.ac.uk/hsdr/projdetails.php?ref=08-1809-227>.  
30  
31
- 32 11. Harwood, R.H., Porock, D., King, N., Edwards, G., Hammond, S., Howe,  
33  
34 L.,...Morrant, J.D. Development of a specialist medical and mental health unit for  
35  
36 older people in an acute general hospital. University of Nottingham Medical Crises in  
37  
38 Older People discussion paper series. 2010. Issue 5, 1-46. ISSN 2044-4230.  
39  
40 <http://nottingham.ac.uk/mcop/documents/papers/mcop-issn2044-4230-issue5.pdf>.  
41  
42
- 43 12. Kitwood T. Dementia Reconsidered: The person comes first. Open University Press,  
44  
45 Buckingham. 1997.
- 46  
47 13. Brooker, D. Person-centred dementia care. Jessica Kingsley Publishers, London &  
48  
49 Philadelphia . 2007.
- 50  
51 14. Pool, J. The Pool Activity level (PAL) instrument for occupational profiling: a  
52  
53 practical resource for people with cognitive impairments: 3<sup>rd</sup> ed. Jessica King  
54  
55 Publishers, London. 2008.  
56  
57  
58  
59  
60

- 1  
2  
3  
4  
5  
6  
7  
8  
9  
10  
11  
12  
13  
14  
15  
16  
17  
18  
19  
20  
21  
22  
23  
24  
25  
26  
27  
28  
29  
30  
31  
32  
33  
34  
35  
36  
37  
38  
39  
40  
41  
42  
43  
44  
45  
46  
47  
48  
49  
50  
51  
52  
53  
54  
55  
56  
57  
58  
59  
60
15. Harwood, R.H., Goldberg, S.E., Whittamore, K.H., Russell, C., Gladman, J., Jones, R.G.,...L.E., Elliott, R.A. and Medical Crises in Older People Study Group (MCOP). Study protocol. 2011. Evaluation of a Medical and Mental Health Unit compared with standard care for older people whose emergency admission to an acute general hospital is complicated by concurrent 'confusion': a controlled clinical trial. *Trials*, 12:123. 1-11. doi:10.1186/1745-6215-12-123. <http://www.trialsjournal.com/content/12/1/123>.
16. Goldberg, S.E., Bradshaw, L.E., Kearney, F.C., Russell, C., Whittamore, K., Foster, P. Harwood, R.H. (2013). Care in a specialist Medical and Mental Health Unit compared with standard care for older people with cognitive impairment admitted to a general hospital: a randomised controlled trial (NIHR TEAM trial). *BMJ* 2013; 347 doi: <http://dx.doi.org/10.1136/bmj.f4132>.
17. Ritchie, J., Spencer, L. Qualitative data analysis for applied policy research. In 'Analyzing Qualitative Data'. Edited by Bryman, A., Burgess, R.G. London: Routledge. 1994.
18. Srivastava, A. & Thomson, S.B. Framework analysis: a qualitative methodology for applied policy research. *Journal of Administration & Governance*. 2009; 4,2, 72-79. [http://www.joaag.com/uploads/06\\_Research\\_Note\\_Srivastava\\_and\\_Thomson\\_4\\_2\\_.pdf](http://www.joaag.com/uploads/06_Research_Note_Srivastava_and_Thomson_4_2_.pdf).
19. Rozenblum, R., Lisby, M., Hockley, P.M., Levitizion-Korach, O., Salzberg C.A., Lipsitz, S., Bates, D.W. Uncovering the blind spot of patient satisfaction: an international survey. *BMJ Qual Saf*, 2011; 20, 959-965. doi:10.1136/bmjqs-2011-000306.



- 1  
2  
3  
4  
5  
6  
7  
8  
9  
10  
11  
12  
13  
14  
15  
16  
17  
18  
19  
20  
21  
22  
23  
24  
25  
26  
27  
28  
29  
30  
31  
32  
33  
34  
35  
36  
37  
38  
39  
40  
41  
42  
43  
44  
45  
46  
47  
48  
49  
50  
51  
52  
53  
54  
55  
56  
57  
58  
59  
60
20. Brooker, D. What is person-centred care in dementia? *Reviews in Clinical Gerontology*, 2003; 13,3, 215-222.  
<http://journals.cambridge.org/action/displayAbstract?fromPage=online&aid=230595>.
21. Edvardsson, D., Winblad, B., Sandman, P.O. Person-centred care of people with severe Alzheimer's disease: current status and ways forward. *Lancet Neurol*, 2008; 4, 362-7. doi:10.1016/S1474-4422(08)70063-2.
22. Clissett, P., Porock, D., Harwood, R.H., Gladman J. The challenges of achieving person-centred care in acute hospitals: a qualitative study of people with dementia and their families. *International Journal of Nursing Studies*. 2013; (11):1495-503. doi: 10.1016/j.ijnurstu.2013.03.001. <http://dx.doi.org/10.1016/j.ijnurstu.2013.03.001>
23. Clarke, A., Hanson, E. J. & Ross, H. Seeing the person behind the patient: enhancing the care of older people using a biographical approach, *Journal of Clinical Nursing*, 2003; 12, 697-706.  
<http://www.ncbi.nlm.nih.gov/pubmed/12919216>.
24. Day, K., Carreon, D. & Stump, C. The therapeutic design of environments for people with dementia. *The Gerontologist*. 2000; 40, 4, 397-416.  
<http://www.ncbi.nlm.nih.gov/pubmed/10961029>.
25. Lawton, M. P. The physical environment of the person with Alzheimer's disease. *Aging & Mental Health*, 2001; 5(2), 56-64.  
<http://www.ncbi.nlm.nih.gov/pubmed/11513499>.
26. Overshott, R., Burns, A., Winblad, B. Non-pharmacological treatment of severe dementia: An Overview. (Eds.). This is chapter 13 in 'Server dementia' John, Wiley & Sons Ltd. Chichester. 2006;.164-175. doi: 10.1002/0470010568.ch13.
27. Edvardsson, D., Fetherstonhaugh, D., Nay, R. (2010). Promoting a continuation of self and normality: person-centred care as described by people with dementia,

- 1  
2  
3 their family members and aged care staff. *Journal of Clinical Nursing*,19, 2611-  
4  
5 2618. doi: [10.1111/j.1365-2702.2009.03143.x](https://doi.org/10.1111/j.1365-2702.2009.03143.x)  
6  
7  
8 28. Whittamore, K.H., Goldberg, S.E., Gladman, J., Bradshaw, L.E., Jones, R.G.,  
9  
10 Harwood, R.H. (2013). The diagnosis, prevalence and outcome of delirium in a  
11  
12 cohort of older people with mental health problems on general hospital wards.  
13  
14 *International Journal of Geriatric Psychiatry*, doi: [10.1002/gps.3961](https://doi.org/10.1002/gps.3961).  
15  
16  
17 29. Borbasi, S., Jones, J., Lockwood, C., Emden, C. Health professionals' perspectives of  
18  
19 providing care to people with dementia in the acute setting: Toward better practice.  
20  
21 *Geriatric Nursing*, 2006, 27,5, 300-8.  
22  
23 <http://www.ncbi.nlm.nih.gov/pubmed/17045129>.  
24  
25  
26 30. Adams, T. & Gardiner, P. Communication and interaction within dementia care  
27  
28 triads. Developing a theory for relationship person-centred care. *Dementia*, 2005;  
29  
30 4 (2), 185-205. doi: [10.1177/1471301205051092](https://doi.org/10.1177/1471301205051092).  
31  
32  
33 31. Nolan, M.R., Davies, S., Brown, J., Keady, J., Nolan, J. (2004). Beyond person-  
34  
35 centered care: a new vision for gerontological nursing. *J Clin Nurs*.2004; 13,3a,45-53.  
36  
37 [http://www.ssiacymru.org.uk/resource/9\\_n\\_Beyond\\_Person\\_Centred\\_Care.pdf](http://www.ssiacymru.org.uk/resource/9_n_Beyond_Person_Centred_Care.pdf).  
38  
39  
40 32. Tolson, D., Smith, M., Knight ,P. An investigation of the components of best nursing  
41  
42 practice in the care of acutely ill hospitalized older patients with coincidental  
43  
44 dementia: a multi-method design. *Journal of Advanced Nursing*, 1999; 30, 1127-36.  
45  
46 <http://onlinelibrary.wiley.com/doi/10.1046/j.1365-2648.1999.01194.x/pdf>.  
47  
48  
49 33. Bradshaw, L.E., Goldberg, S.E., Schneider, J.M., Harwood, R.H. (2012). Carers' for  
50  
51 older people with co-morbid cognitive impairment in general hospital: characteristics  
52  
53 and psychological well-being. *Int J Geriatr Psychiatry*, 2013; 28(7):681-90. doi:  
54  
55 [10.1002/gps.3871](https://doi.org/10.1002/gps.3871).  
56  
57  
58  
59  
60

- 1  
2  
3 34. Li, H., Powers, B.A., Melnyk, B.M., McCann, R., Koulouglioti, C., Anson, E., Smith,  
4  
5 J.A. ...Tu, X. Randomized Controlled Trial of CARE: An Intervention to Improve  
6  
7 Outcomes of Hospitalized Elders and Family Caregivers. *Research in Nursing &*  
8  
9 *Health*, 2012; 35, 533–549. doi: 10.1002/nur.21491.  
10  
11  
12 35. Waller, S. (2012). Redesigning wards to support people with dementia in hospital.  
13  
14 *Nursing Older People*. 24,2, 16-21.  
15  
16 [http://nursingolderpeople.rcnpublishing.co.uk/archive/article-redesigning-wards-](http://nursingolderpeople.rcnpublishing.co.uk/archive/article-redesigning-wards-to-support-people-with-dementia-in-hospital)  
17  
18 [to-support-people-with-dementia-in-hospital.](http://nursingolderpeople.rcnpublishing.co.uk/archive/article-redesigning-wards-to-support-people-with-dementia-in-hospital)  
19  
20  
21 36. Nufer, T.W., Spichiger, E. How family carers of people with dementia experienced  
22  
23 their stay on an acute care facility and their own collaboration with professionals: a  
24  
25 qualitative study. *Pflege*. 2011; 24, 4, 229-37. doi: 10.1024/1012-5302/a000130.  
26  
27  
28 37. Lindhardt, T., Nyber, P., Hallberg, I.R. Collaboration between relatives of elderly  
29  
30 patients and nurses and it's relation to satisfaction with the hospital care  
31  
32 trajectory. *Scand J Caring Sci*. 2008; 22,4, 507-19. doi: 10.1111/j.1471-  
33  
34 [6712.2007.00558.x](https://doi.org/10.1111/j.1471-6712.2007.00558.x).  
35  
36  
37 38. Tadd, W., Hillman, A., Calnan, S., Calnan, M., Bayer, T., Read, S., Dignity in  
38  
39 Practice: An exploration of the care of older adults in acute NHS Trusts. (A  
40  
41 research summary). NIHR Service Delivery and Organisation Programme. 2011.  
42  
43 [www.sdo.nihr.ac.uk/projdetails.php?ref=08-1819-218](http://www.sdo.nihr.ac.uk/projdetails.php?ref=08-1819-218).  
44  
45  
46 39. Care Quality Commission. Dignity and nutrition inspection programme: National  
47  
48 overview. 2011.  
49  
50 [http://www.cqc.org.uk/sites/default/files/media/documents/20111007\\_dignity\\_and](http://www.cqc.org.uk/sites/default/files/media/documents/20111007_dignity_and_nutrition_inspection_report_final_update.pdf)  
51  
52 [\\_nutrition\\_inspection\\_report\\_final\\_update.pdf](http://www.cqc.org.uk/sites/default/files/media/documents/20111007_dignity_and_nutrition_inspection_report_final_update.pdf).  
53  
54  
55  
56  
57  
58  
59  
60

1  
2  
3 40. Royal College Nursing (RCN). Dementia: Commitment to the care of people with  
4 dementia in hospital settings. London. 2013.

5  
6  
7 [http://www.rcn.org.uk/\\_data/assets/pdf\\_file/0011/480269/004235.pdf](http://www.rcn.org.uk/_data/assets/pdf_file/0011/480269/004235.pdf).

8  
9  
10 41. Alzheimer's Society. Dementia 2012: A national challenge. London. Alzheimer's  
11 Society. 2012. <http://www.alzheimers.org.uk/dementia2012>.

12  
13  
14  
15  
16  
17  
18  
19  
20  
21  
22  
23  
24  
25  
26  
27  
28  
29  
30  
31  
32  
33  
34  
35  
36  
37  
38  
39  
40  
41  
42  
43  
44  
45  
46  
47  
48  
49  
50  
51  
52  
53  
54  
55  
56  
57  
58  
59  
60

For peer review only

**Appendix 1: Themes identified from interviews with family carers of hospital patients with dementia**

| Categories                              | Theme                                        |
|-----------------------------------------|----------------------------------------------|
| Caring for people with Dementia         | Staff knowledge of dementia                  |
|                                         | Staff attitudes towards people with dementia |
|                                         | Appropriate delivery of dementia care        |
|                                         | Inexperienced in delivering dementia care    |
| Communication with health professionals | Being informed                               |
|                                         | Carer expectations                           |
|                                         | Hospital staff approachable                  |
|                                         | Carers' questions answered                   |
|                                         | Staff distant                                |
|                                         | Staff approached carers                      |
|                                         | Personal profile documentation               |
|                                         | Medical treatment                            |
|                                         | Fundamental nursing care                     |
| Toileting issues                        |                                              |
| Treatment                               | Safety and protection                        |
|                                         | Night time issues                            |
|                                         | Admission                                    |
|                                         | End of life care                             |
|                                         | Discharge arrangements                       |
|                                         | Care package                                 |
|                                         | Meals and eating                             |

|    |                        |                                   |
|----|------------------------|-----------------------------------|
| 1  |                        |                                   |
| 2  |                        |                                   |
| 3  |                        | Pain relief                       |
| 4  |                        |                                   |
| 5  | Activities and boredom | Appreciate of activities offered  |
| 6  |                        |                                   |
| 7  |                        | Little stimulus for patients      |
| 8  |                        |                                   |
| 9  |                        | Too ill to engage in activities   |
| 10 |                        |                                   |
| 11 |                        | Boredom                           |
| 12 |                        |                                   |
| 13 | Ward environment       | Decor and cleanliness             |
| 14 |                        |                                   |
| 15 |                        | Personalised patient surroundings |
| 16 |                        |                                   |
| 17 |                        | Day room                          |
| 18 |                        |                                   |
| 19 |                        | Sensory room                      |
| 20 |                        |                                   |
| 21 |                        | Ward being special                |
| 22 |                        |                                   |
| 23 | Family carers          | Relationship to the patient       |
| 24 |                        |                                   |
| 25 |                        | Visiting times                    |
| 26 |                        |                                   |
| 27 |                        | Involved in hospital care         |
| 28 |                        |                                   |
| 29 |                        | Carer concerns                    |
| 30 |                        |                                   |
| 31 |                        | Improving care                    |
| 32 |                        |                                   |
| 33 |                        |                                   |
| 34 |                        |                                   |
| 35 |                        |                                   |
| 36 |                        |                                   |
| 37 |                        |                                   |
| 38 |                        |                                   |
| 39 |                        |                                   |
| 40 |                        |                                   |
| 41 |                        |                                   |
| 42 |                        |                                   |
| 43 |                        |                                   |
| 44 |                        |                                   |
| 45 |                        |                                   |
| 46 |                        |                                   |
| 47 |                        |                                   |
| 48 |                        |                                   |
| 49 |                        |                                   |
| 50 |                        |                                   |
| 51 |                        |                                   |
| 52 |                        |                                   |
| 53 |                        |                                   |
| 54 |                        |                                   |
| 55 |                        |                                   |
| 56 |                        |                                   |
| 57 |                        |                                   |
| 58 |                        |                                   |
| 59 |                        |                                   |
| 60 |                        |                                   |

---

# Consolidated criteria for reporting qualitative research (COREQ): a 32-item checklist for interviews and focus groups

**Table 1**

Consolidated criteria for reporting qualitative studies (COREQ): 32-item checklist

| No                                                                                                                                         | Item                                    | Guide questions/description                                 |
|--------------------------------------------------------------------------------------------------------------------------------------------|-----------------------------------------|-------------------------------------------------------------|
| <b>Domain 1:</b>                                                                                                                           |                                         |                                                             |
| <b>Research team and reflexivity</b>                                                                                                       |                                         |                                                             |
| Personal                                                                                                                                   |                                         |                                                             |
| Characteristics                                                                                                                            |                                         |                                                             |
| 1.                                                                                                                                         | Interviewer/facilitator or focus group? | Which author/s conducted the interview                      |
| <b>First author</b>                                                                                                                        |                                         |                                                             |
| 2.                                                                                                                                         | Credentials<br>E.g. PhD, MD             | What were the researcher's credentials?                     |
| <b>First author MA, PhD, second author MA, third author MPhil, fourth author, PhD, Fifth author Consultant Geriatrician/Professor.</b>     |                                         |                                                             |
| 3.                                                                                                                                         | Occupation                              | What was their occupation at the time of the study?         |
| <b>1. Research Fellow, 2. Research Associate, 3. Clinical Researcher. 4. Senior Research Fellow. 5. Consultant Geriatrician/Professor.</b> |                                         |                                                             |
| 4.                                                                                                                                         | Gender                                  | Was the researcher male or female?                          |
| <b>Authors 1,2, 3, 4 female, Author 5 male.</b>                                                                                            |                                         |                                                             |
| 5.                                                                                                                                         | Experience and training                 | What experience or training did the researcher have?        |
| <b>All author has done previous qualitative projects and attended several trainings and workshops.</b>                                     |                                         |                                                             |
| <b>Relationship with participants</b>                                                                                                      |                                         |                                                             |
| 6.                                                                                                                                         | Relationship established                | Was a relationship established prior to study commencement? |
| <b>Relationships were not established prior to interviews.</b>                                                                             |                                         |                                                             |

| No | Item                                                                                                        | Guide questions/description              |
|----|-------------------------------------------------------------------------------------------------------------|------------------------------------------|
| 7. | Participant knowledge of the interviewer<br>researcher? e.g. personal goals, reasons for doing the research | What did the participants know about the |

**Personal interest in research and reasons for doing it were described prior to the interviews.**

|    |                                                                                                                                  |                                          |
|----|----------------------------------------------------------------------------------------------------------------------------------|------------------------------------------|
| 8. | Interviewer characteristics of the interviewer/facilitator? e.g. Bias, assumptions, reasons and interests in the research topic. | What characteristics were reported about |
|----|----------------------------------------------------------------------------------------------------------------------------------|------------------------------------------|

**Descriptions of interviewers experience of approaches including references to publicly available written work.**

**Domain 2:  
study design**

Theoretical  
framework

|    |                                       |                                                                                                                                                          |
|----|---------------------------------------|----------------------------------------------------------------------------------------------------------------------------------------------------------|
| 9. | Methodological orientation and Theory | What methodological orientation was stated to underpin the study? e.g. grounded theory, discourse analysis, ethnography, phenomenology, content analysis |
|----|---------------------------------------|----------------------------------------------------------------------------------------------------------------------------------------------------------|

**Constant Comparison / Thematic Framework analysis.**

Participant  
selection

|     |          |                                                                                     |
|-----|----------|-------------------------------------------------------------------------------------|
| 10. | Sampling | How were participants selected? e.g. purposive, convenience, consecutive, snowball. |
|-----|----------|-------------------------------------------------------------------------------------|

**Purposive.**

|     |                                                            |                                        |
|-----|------------------------------------------------------------|----------------------------------------|
| 11. | Method of approach<br>face-to-face, telephone, mail, email | How were participants approached? e.g. |
|-----|------------------------------------------------------------|----------------------------------------|

**Face to face**

|     |             |                                          |
|-----|-------------|------------------------------------------|
| 12. | Sample size | How many participants were in the study? |
|-----|-------------|------------------------------------------|

**40**

|     |                                               |                                        |
|-----|-----------------------------------------------|----------------------------------------|
| 13. | Non-participation<br>or dropped out? Reasons? | How many people refused to participate |
|-----|-----------------------------------------------|----------------------------------------|



| No  | Item                                                                                          | Guide questions/description                                |
|-----|-----------------------------------------------------------------------------------------------|------------------------------------------------------------|
|     | <b>Four refused the invitation to participate. Reasons were not sought. None dropped out.</b> |                                                            |
|     | Setting                                                                                       |                                                            |
| 14. | Setting of data collection                                                                    | Where was the data collected? e.g. home, clinic, workplace |

**In a place selected by participants. Usually home or a suitable room at the hospital.**

|     |                             |                                                                   |
|-----|-----------------------------|-------------------------------------------------------------------|
| 15. | Presence of nonparticipants | Was anyone else present besides the participants and researchers? |
|-----|-----------------------------|-------------------------------------------------------------------|

**Yes Hospital patient related to family carer interviewed.**

|     |                       |                                                                                   |
|-----|-----------------------|-----------------------------------------------------------------------------------|
| 16. | Description of sample | What are the important characteristics of the sample? e.g. demographic data, date |
|-----|-----------------------|-----------------------------------------------------------------------------------|

**Demographic data described i.e. how carer was related to the hospital patient and gender.**

Data collection

|     |                 |                                                                               |
|-----|-----------------|-------------------------------------------------------------------------------|
| 17. | Interview guide | Were questions, prompts, guides provided by the authors? Was it pilot tested? |
|-----|-----------------|-------------------------------------------------------------------------------|

**There was not pilot testing. Interview approach is described in the methods section.**

|     |                   |                                                       |
|-----|-------------------|-------------------------------------------------------|
| 18. | Repeat interviews | Were repeat interviews carried out? If yes, how many? |
|-----|-------------------|-------------------------------------------------------|

**No. Not part of the study design.**

|     |                        |                                                                     |
|-----|------------------------|---------------------------------------------------------------------|
| 19. | Audio/visual recording | Did the research use audio or visual recording to collect the data? |
|-----|------------------------|---------------------------------------------------------------------|

**Data was audio recorded.**

|     |             |                                                                         |
|-----|-------------|-------------------------------------------------------------------------|
| 20. | Field notes | Were field notes made during and/or after the interview or focus group? |
|-----|-------------|-------------------------------------------------------------------------|

**Yes.**

1  
2  
3 No Item Guide questions/description  
4  
5 21. Duration What was the duration of the interviews  
6 or focus group?  
7

8  
9 **Variable. From 45 minutes to 90 minutes.**

10  
11 22. Data saturation Was data saturation discussed?  
12

13 **Yes.**

14  
15 23. Transcripts returned Were transcripts returned to participants  
16 for comment and/or correction?  
17

18  
19 **Yes.**

20  
21 **Domain 3:**  
22 **analysis and**  
23 **findings**  
24

25 Data analysis

26  
27 24. Number of data coders How many data coders coded the data?  
28  
29

30 **Three.**

31  
32 25. Description of the coding tree Did authors provide a description of the  
33 coding tree?  
34

35 **Yes, see appendix 1.**

36  
37 26. Derivation of themes Were themes identified in advance or  
38 derived from the data?  
39

40  
41 **Derived from the data.**

42  
43  
44 27. Software What software, if applicable, was used to  
45 manage the data?  
46

47 **Nvivo 10.**

48  
49 28. Participant checking Did participants provide feedback on the  
50 findings?  
51

52  
53 **They were invited to but did not respond to**  
54 **requests.**  
55  
56  
57  
58  
59  
60

1  
2  
3 No Item Guide questions/description  
4  
5 Reporting Were participant quotations presented to  
6 illustrate the themes / findings?  
7

8 **Yes.**

9  
10  
11 29. Quotations presented Was each quotation identified? E.g.  
12 *participant number*

13  
14 **They were not identified in order to preserve**  
15 **confidentiality so no one person's story**  
16 **could be put together and identified.**

17  
18 30. Data and findings consistent Was there consistency between the data  
19 presented and the findings?  
20

21 **Yes.**

22  
23  
24 31. Clarity of major themes Were major themes clearly presented in  
25 the  
26 findings?  
27

28 **Yes.**

29  
30  
31 32. Clarity of minor themes Is there a description of diverse cases or  
32 discussion of minor themes?  
33

34 **Yes.**
