# Supplementary material for: Delivering dementia care differently—evaluating the differences and similarities between a specialist medical and mental health unit and standard acute care wards: a qualitative study of family carers’ perceptions of quality of care
Source: HighWire-hosted journal article supplement (doi:10.1136/bmjopen-2013-004198), 2013-12-01
Supplement: bmjopen-2013-004198supp_appendix.pdf [file bmjopen-2013-004198supp_appendix.pdf]

## Appendix 1: Themes identified from interviews with family carers of hospital patients with dementia

| Categories                              | Theme                                        |
|-----------------------------------------|----------------------------------------------|
| Caring for people with Dementia         | Staff knowledge of dementia                  |
|                                         | Staff attitudes towards people with dementia |
|                                         | Appropriate delivery of dementia care        |
|                                         | Inexperienced in delivering dementia care    |
| Communication with health professionals | Being informed                               |
|                                         | Carer expectations                           |
|                                         | Hospital staff approachable                  |
|                                         | Carers' questions answered                   |
|                                         | Staff distant                                |
|                                         | Staff approached carers                      |
|                                         | Personal profile documentation               |
| Treatment                               | Medical treatment                            |
|                                         | Fundamental nursing care                     |
|                                         | Toileting issues                             |
|                                         | Safety and protection                        |
|                                         | Night time issues                            |
|                                         | Admission                                    |
|                                         | End of life care                             |
|                                         | Discharge arrangements                       |
|                                         | Care package                                 |
| Meals and eating                        |                                              |

|                        |                                   |
|------------------------|-----------------------------------|
|                        | Pain relief                       |
| Activities and boredom | Appreciate of activities offered  |
|                        | Little stimulus for patients      |
|                        | Too ill to engage in activities   |
|                        | Boredom                           |
| Ward environment       | Decor and cleanliness             |
|                        | Personalised patient surroundings |
|                        | Day room                          |
|                        | Sensory room                      |
|                        | Ward being special                |
| Family carers          | Relationship to the patient       |
|                        | Visiting times                    |
|                        | Involved in hospital care         |
|                        | Carer concerns                    |
|                        | Improving care                    |

---
